# Supplementary material for: Bacterial antibiotic resistance development and mutagenesis following exposure to subminimal inhibitory concentrations of fluoroquinolones in vitro: a systematic literature review protocol
Source: PubMed Central journal article supplement — BMJ Open. 2019 Oct 30;9(10):e030747. doi: 10.1136/bmjopen-2019-030747 (PMC6830604; doi:10.1136/bmjopen-2019-030747), 2019-10-30
Supplement: bmjopen-2019-030747.draft_revisions.pdf [file bmjopen-2019-030747.draft_revisions.pdf]

# BMJ Open

BMJ Open is committed to open peer review. As part of this commitment we make the peer review history of every article we publish publicly available.

When an article is published we post the peer reviewers' comments and the authors' responses online. We also post the versions of the paper that were used during peer review. These are the versions that the peer review comments apply to.

The versions of the paper that follow are the versions that were submitted during the peer review process. They are not the versions of record or the final published versions. They should not be cited or distributed as the published version of this manuscript.

BMJ Open is an open access journal and the full, final, typeset and author-corrected version of record of the manuscript is available on our site with no access controls, subscription charges or pay-per-view fees (<http://bmjopen.bmj.com>).

If you have any questions on BMJ Open's open peer review process please email [info.bmjopen@bmj.com](mailto:info.bmjopen@bmj.com)

# BMJ Open

## **Bacterial antibiotic resistance development and mutagenesis following exposure to sub-minimal inhibitory concentrations of fluoroquinolones: a systematic literature review protocol**

|                               |                                                                                                                                                                                                                                                                                             |
|-------------------------------|---------------------------------------------------------------------------------------------------------------------------------------------------------------------------------------------------------------------------------------------------------------------------------------------|
| Journal:                      | <i>BMJ Open</i>                                                                                                                                                                                                                                                                             |
| Manuscript ID                 | bmjopen-2019-030747                                                                                                                                                                                                                                                                         |
| Article Type:                 | Protocol                                                                                                                                                                                                                                                                                    |
| Date Submitted by the Author: | 01-Apr-2019                                                                                                                                                                                                                                                                                 |
| Complete List of Authors:     | Ching, Carly; Boston University, Biomedical Engineering<br>Orubu, Ebiowei; Boston University, Institute for Health System Innovation and Policy<br>Wirtz, Veronika; Boston University School of Public Health, Global Health<br>Zaman, Muhammad ; Boston University, Biomedical Engineering |
| Keywords:                     | Microbiology < BASIC SCIENCES, INFECTIOUS DISEASES, Health policy<br>< HEALTH SERVICES ADMINISTRATION & MANAGEMENT                                                                                                                                                                          |
|                               |                                                                                                                                                                                                                                                                                             |

SCHOLARONE™  
Manuscripts

1  
2  
3 1  
4  
5  
6 2  
7  
8  
9 3  
10  
11  
12 4  
13  
14  
15 5 **Bacterial antibiotic resistance development and mutagenesis following exposure to sub-**  
16  
17 6 **minimal inhibitory concentrations of fluoroquinolones: a systematic literature review**  
18  
19  
20 7 **protocol**  
21  
22  
23 8•

24  
25 9 Carly Ching<sup>1</sup>, Ebiowei S.F. Orubu<sup>2</sup>, Veronika J. Wirtz<sup>3</sup>, Muhammad H. Zaman<sup>1\*</sup>  
26  
27

28 10 <sup>1</sup>Department of Biomedical Engineering, Boston University, Boston, MA, USA <sup>2</sup>Institute for  
29 11 Health System Innovation and Policy, Boston University, Boston, MA, USA <sup>3</sup>Department of  
30 12 Global Health, Boston University School of Public Health, Boston, MA, USA  
31  
32  
33 13

34  
35 14• \* Muhammad H. Zaman

36  
37 15• Department of Biomedical Engineering

38  
39 16 Boston University,

40  
41 17 44 Cummington Mall

42  
43 18 Boston, Massachusetts 02215

44  
45 19 617-358-5881

46  
47 20 zaman@bu.edu  
48

49 21•  
50  
51 22• Word Count: 1248 (excluding tables)  
52  
53  
54 23  
55  
56  
57  
58  
59  
60

1  
2  
3 24 **ABSTRACT**  
4  
5

6  
7 25 **Introduction:** Antimicrobial resistance (AMR) is among the most pressing global health  
8  
9 26 challenges. However, while many drivers are known, the impact of medicine quality on AMR  
10  
11 27 remains largely elusive. The aim of this review is to systematically evaluate evidence on sub-  
12  
13 28 inhibitory levels of antibiotic, a major tenant of substandard antibiotics, on AMR, using  
14  
15 29 fluoroquinolones as a case study.  
16  
17

18  
19 30 **Methods and analysis:** PubMed, EMBASE and Web of Science will be systematically searched  
20  
21 31 for primary experimental studies related to sub-inhibitory fluoroquinolone treatment and AMR.  
22  
23 32 A specifically developed non-weighted quality assessment tool will be used. Subgroup analyses  
24  
25 33 will be performed for different variables and outcomes.  
26  
27

28  
29 34 **Ethics and dissemination:** Ethical approval is not required as no primary data is to be collected.  
30  
31 35 The completed systematic review will be disseminated through conference meeting presentations  
32  
33 36 and a peer-reviewed publication.  
34  
35  
36  
37

38 37

39  
40  
41 38

42  
43  
44  
45 39

46  
47  
48 40

49  
50  
51 41

52  
53  
54  
55 42

## 43 STRENGTHS AND LIMITATIONS OF THIS STUDY

- 44 • This is the first systematic review of this body of evidence
- 45 • NCBI PubMed, ISI Web of Science and Elsevier Embase will be searched for impact of  
46 sub-inhibitory concentrations of fluoroquinolones on antimicrobial resistance without date  
47 or language limitation
- 48 • Microbiological experimental evidence will be in the context of an important global health  
49 issue, medicine quality following Preferred Reporting Items for Systematic Review and  
50 Meta-Analyses (PRISMA) protocol standards.
- 51 • Even though two researchers will independently review study titles some relevant studies  
52 may be missed

## 53 INTRODUCTION

54 Antimicrobial resistance (AMR) is a global health threat. To be able to fully address this problem  
55 from clinical and policy standpoints it is paramount to understand all of the drivers of AMR  
56 development and spread. An understudied possible driver is the prevalence and use of poor quality  
57 medicines, specifically substandard antibiotics. Substandard drugs are defined by the World Health  
58 Organization as “*authorized medical products that fail to meet either their quality standards or  
59 their specifications, or both*” [1]. The threat of substandard antibiotic usage is highest in low and  
60 middle income countries, where the failure rate for antibiotics to meet quality standards has been  
61 reported to be greater than 7% [1].

62 Substandard antibiotics often contain wrong, or inadequate levels of the active pharmaceutical  
63 ingredient (API) (below the stated concentration or quality standards) or have poor dissolution.

1  
2  
3 64 This results in the treatment of bacteria at sub-inhibitory concentrations below their minimal  
4  
5 65 inhibitory concentration (MIC). Thus, there is not enough API to completely clear the bacterial  
6  
7  
8 66 infection but there may be enough API to provide selective pressure for AMR development. Thus,  
9  
10 67 medicine quality is a potentially important driver of AMR, however there is currently a lack in  
11  
12 68 direct evidence to support this hypothesis [2].  
13  
14

15 69 Here, we seek to fill this important gap by systematically synthesizing experimental evidence on  
16  
17 70 how sub-inhibitory concentrations of one specific class, fluoroquinolones, impacts AMR. We  
18  
19 71 further aim to identify gaps in evidence for the relationship between substandard antibiotics usage  
20  
21 72 and AMR development. Currently, there are only a few broad narrative literature reviews on the  
22  
23 73 impacts sub-inhibitory concentrations of antibiotics [3–6]. This systematic review aims to merge  
24  
25 74 experimental evidence with public health implications. Furthermore, to our knowledge, there are  
26  
27 75 currently few to no systematic reviews of basic microbiological experimental studies. Thus, we  
28  
29 76 seek to apply Preferred Reporting Items for Systematic Review and Meta-Analyses (PRISMA)  
30  
31 77 guidelines to a systematic review on experimental microbiological data in an effort for more  
32  
33 78 unbiased literature summaries. In summary, the results of this systematic review will contribute to  
34  
35 79 understanding the potential effects of poor quality medicines on antibiotic resistance acquisition,  
36  
37 80 identify gaps in evidence, and inform policy-making on the control of substandard medicines.  
38  
39  
40  
41  
42  
43

#### 44 **Systematic review questions**

45  
46 82 This review seeks to address the following questions:  
47  
48

- 49 83 1. Does sub-inhibitory fluoroquinolone exposure increase bacterial antibiotic resistance  
50  
51 84 development and mutagenesis?  
52  
53  
54 85 2. What is the potential for substandard drugs to influence antibiotic resistance development?  
55  
56  
57  
58  
59

## 86 METHODS

87 Our methodology will conform to the PRSMA reporting standards (Appendix 1, PRISMA-P  
88 Checklist). The protocol does not currently exist elsewhere and is ineligible for hosting on  
89 PROSPERO.

### 90 Patient and Public Involvement

91 It was not appropriate or possible to involve patients or the public in this work.

### 92 Eligibility Criteria

93 To define the search approach, inclusion and exclusion criteria and identify the outcomes we  
94 applied a Population Intervention Comparator Outcome Study (PICOS) search tool. The criteria is  
95 presented in Table. 1.

96 **Table 1. Population Intervention Comparator Outcome Study (PICOS) Design Criteria**

|                   | <b>Include</b>                                                                                                                                                                                                                                                   | <b>Exclude</b>              |
|-------------------|------------------------------------------------------------------------------------------------------------------------------------------------------------------------------------------------------------------------------------------------------------------|-----------------------------|
| <b>Population</b> | Bacteria (All Wild and Resistant<br>Isolates of Gram-negative and Gram-<br>positive Species) <ul style="list-style-type: none"> <li>• pathogenic</li> <li>• non-pathogenic</li> <li>• clinical</li> <li>• environmental</li> <li>• community-acquired</li> </ul> | Eukaryotes (All)<br>Archaea |

|                                 |                                                                                                                                                                                                                           |                                                                                                                                                                                                                                                                                                                                                                         |
|---------------------------------|---------------------------------------------------------------------------------------------------------------------------------------------------------------------------------------------------------------------------|-------------------------------------------------------------------------------------------------------------------------------------------------------------------------------------------------------------------------------------------------------------------------------------------------------------------------------------------------------------------------|
|                                 | <ul style="list-style-type: none"> <li>lab/domesticated strains</li> </ul>                                                                                                                                                |                                                                                                                                                                                                                                                                                                                                                                         |
| <b>Intervention (Treatment)</b> | <p>Treatment with ranges of fluoroquinolone concentrations with levels below the defined minimum inhibitory concentration (MIC), <i>in vitro</i>.</p> <p>All fluoroquinolones will be included.</p>                       | <p>Treatment at MIC or above MIC, if sub-MIC treatment is not considered.</p> <p>Treatment with sub-MIC fluoroquinolone concentrations in synergy with another class of antibiotic or compound.</p> <p>Treatment with first-generation quinolone antibiotics or other classes of antibiotics.</p> <p>Purely computational models.</p> <p>Studies involving animals.</p> |
| <b>Comparator</b>               | No treatment (same experimental conditions, 0% API)                                                                                                                                                                       |                                                                                                                                                                                                                                                                                                                                                                         |
| <b>Outcomes</b>                 | <p>Experimental microbiological data related to:</p> <ul style="list-style-type: none"> <li>resistance acquisition (to same or other antibiotic) and mutagenesis rate</li> </ul> <p>Examples of data include standard</p> | <p>Outcomes from studies that treat bacteria with sub-lethal levels but do not follow-up with results related to resistance acquisition, mutagenesis or gene expression. Examples of results to exclude include community behavior, such as surface cell adhesion and biofilm formation, virulence (persister formation, toxin/antitoxin systems) and</p>               |



|                     |                                                                                                                                                                   |                                                                                                                                                    |
|---------------------|-------------------------------------------------------------------------------------------------------------------------------------------------------------------|----------------------------------------------------------------------------------------------------------------------------------------------------|
|                     | microbiological assays, genomic sequencing and transcriptomics.<br><br>Discussion of substandard of poor quality medicines.                                       | plasmid curing.<br><br>Studies investigating prophylaxis (long-term low dose treatment).                                                           |
| <b>Study Design</b> | Primary Experimental Studies (All Languages) published from 1966-2018 on NCBI PubMed, from 1965-2018 on ISI Web of Science and from 1947-2018 on Elsevier Embase. | Conference abstracts<br><br>Foreign language articles<br><br>Grey literature<br><br>Review articles (no primary data)<br><br>Observational Studies |

97

## 98 **Outcomes, Prioritization and Data Extraction**

99 The primary outcome extracted will be the effect on exposure to sub-inhibitory concentrations of  
 100 fluoroquinolones on antibiotic resistance acquisition and mutagenesis rates. Secondary outcomes  
 101 will be whether these papers discuss substandard or poor quality medicines will also be extracted.  
 102 Our rationale for prioritization is that we first need to determine the link between exposure and

1  
2  
3 103 resistance acquisition. After quantifying and evaluating the evidence, we aim to assess how  
4  
5 104 frequently primary scientific papers include public health context (not just clinical). Other  
6  
7  
8 105 variables extracted from each study will include year of publication, bacterial species and number  
9  
10 106 of strains strain, type of bacterial isolate, drug name and concentration, and study design (duration  
11  
12 107 of treatment, growth condition, etc.). Study quality and limitations, and gaps in evidence for review  
13  
14  
15 108 questions will also be extracted in addition to reporting on weaknesses in studies and how to  
16  
17 109 improve experimental design. Data will be extracted to a standardized Excel table.  
18  
19

## 20 110 **Search Strategy**

21  
22  
23 111 The search strategy was based on objectives and a preliminary search of PUBMED to determine  
24  
25 112 relevant MeSH terms. Using MeSH terms and keyword synonyms along with identified terms for  
26  
27 113 sub-inhibitory and substandard, a search strategy was designed in PUBMED and translated to Web  
28  
29  
30 114 of Science and Embase to search all fields for articles that fit the inclusion criteria above (Table  
31  
32 115 1). Complete search terms and details are listed below. Additional records will be identified  
33  
34 116 through searching the bibliographies of already-identified papers and searching through papers  
35  
36  
37 117 that have cited key studies. Only those papers that also match the above inclusion criteria will be  
38  
39 118 included. Complete search terms are provided in Appendix 2.  
40  
41

42 119 Identified terms: *subinhibitory, sub-inhibitory, sub inhibitory, sub-lethal, sublethal, sub lethal,*  
43  
44 120 *subminimal, sub-minimal, sub minimal, sub-therapeutic, subtherapeutic, sub therapeutic, sub*  
45  
46 121 *MIC, sub-MIC, low-dose, low dose, substandard, sub-standard, counterfeit, falsified*  
47  
48  
49

## 50 122 **Study records**

51  
52 123 Records will be managed through reference management software Endnote and Mendeley.  
53  
54  
55 124 Additionally, search histories will be saved. Abstract screening and selection of studies will be  
56  
57  
58  
59

125 performed independently by two independent reviewers using software Rayyan QCRI [7]. A third  
 126 researcher will resolve discrepancies between reviewers selections. The full text of articles from  
 127 the initial screening will be reviewed for inclusion. Each paper will be analyzed and key results  
 128 extracted to a standardized table for comparison.

### 129 **Risk of bias in individual studies**

130 Risk of Bias for laboratory microbiology experimentation will be assessed with criteria formulated  
 131 by considering and adapting Systematic Review Centre for Laboratory animal Experimentation  
 132 (SYRCLE)'s risk of bias tool for animal studies [8] and the Effective Public Health Practice Project  
 133 (EPHPP) quality assessment tool [9]. The criteria is presented in Table 2. Here, we present a non-  
 134 weighted assessment of individual study quality, including risk of bias. For each domain, studies  
 135 will be assessed for a series of criteria listed below. For each unmet criteria an increased risk of  
 136 bias point will be assigned. The more points assigned, the higher the risk of bias associated with  
 137 the study.

138 **Table 2. Assessment of risk of bias for laboratory microbiology experimentation**

| Domain                                                                   | Description of domain                                                                                                                                                                          | Review Criteria                                                                                                                       |
|--------------------------------------------------------------------------|------------------------------------------------------------------------------------------------------------------------------------------------------------------------------------------------|---------------------------------------------------------------------------------------------------------------------------------------|
| Baseline characteristics of bacteria/<br>Confounders<br>(Selection Bias) | Describe possible genetic or environmental variations to determine whether results for different strains of the same species can be compared. For clinical isolates, genotype is not required. | Were the groups compared individually or were differences discussed in the analysis?<br><br>Were species and strain details provided? |

| <b>Domain</b>           | <b>Description of domain</b>                                                             | <b>Review Criteria</b>                                                                                                                                                                                                                                                                                                                                                                                                                                                                   |
|-------------------------|------------------------------------------------------------------------------------------|------------------------------------------------------------------------------------------------------------------------------------------------------------------------------------------------------------------------------------------------------------------------------------------------------------------------------------------------------------------------------------------------------------------------------------------------------------------------------------------|
|                         |                                                                                          |                                                                                                                                                                                                                                                                                                                                                                                                                                                                                          |
| Study<br>Design/Methods | Reproducibility and detail of study design and methods. Description of analysis methods. | <p>Are there any discrepancies between methods and in-text?</p> <p>Is the methodological section missing any steps or appropriate detail ?<br/>(including but not limited to below)</p> <p>Steps/Details:</p> <ul style="list-style-type: none"> <li>-media used</li> <li>-temperature</li> <li>-time</li> <li>-incubation conditions (static, rolling, shaking, aeration)</li> <li>- reagents used</li> <li>- concentrations used</li> <li>- appropriate control experiments</li> </ul> |

| <b>Domain</b>                                             | <b>Description of domain</b>                                                                                             | <b>Review Criteria</b>                                                                                                                                                                                                                                                           |
|-----------------------------------------------------------|--------------------------------------------------------------------------------------------------------------------------|----------------------------------------------------------------------------------------------------------------------------------------------------------------------------------------------------------------------------------------------------------------------------------|
|                                                           |                                                                                                                          | -replication of experiments                                                                                                                                                                                                                                                      |
| Incomplete<br>outcome data<br><br>(Attrition Bias)        | Describe the completeness of<br>outcome data being analyzed,<br>including attrition and exclusions<br>from the analysis. | Is there missing outcome data that was<br>not addressed?<br><br>Is the control outcome data mentioned<br>in the paper present?                                                                                                                                                   |
| Selective<br>outcome<br>reporting<br><br>(Reporting bias) | Reporting of aim and all outcomes<br>of the study.                                                                       | Was all data reported for all conditions<br>or just statistically significant results?<br><br>Was it clear whether no change results<br>were reported?<br><br>Was statistical significance noted (if<br>possible)?<br><br>Is the appropriate comparison to<br>baseline provided? |
| Other sources of<br>bias                                  | State any important concerns about<br>bias not covered by other domains.                                                 | Was the study apparently free of<br>concerns about bias?                                                                                                                                                                                                                         |

| <b>Domain</b>      | <b>Description of domain</b> | <b>Review Criteria</b>                                                       |
|--------------------|------------------------------|------------------------------------------------------------------------------|
|                    |                              |                                                                              |
| Global Bias Rating | Summary of all five domains  | Calculate total quality points. The more points the higher the risk of bias. |

139

### 140 **Data Synthesis**

141 Meta-analysis may not be possible based on findings. If possible meta-synthesis will be  
 142 performed to group sets of results based on bacteria or methodology.

### 143 **Meta-bias(es)**

144 Depending on data synthesis parameters, the overall quality of the body of evidence will be  
 145 determined, if possible. We will take into account publication bias across studies. This includes  
 146 any potential publication biases in authors or types of studies, biases towards certain bacteria,  
 147 antibiotics and selective outcomes. Additionally inconsistencies in methodology and outcomes  
 148 will be assessed. This goal will be to determine confidence in reported recommendations or  
 149 trends.

### 150 **Ethics and Dissemination**

151 Ethical approval is not required as no primary data is to be collected. The completed systematic  
 152 review will be disseminated through conference meeting presentations and a peer-reviewed  
 153 publication.

### 154 **Authors Contributions**

1  
2  
3 155 C.C., V.J.W and M.H.Z. initiated work. C.C., E.S.F.O., V.J.W and M.H.Z designed and wrote  
4  
5 156 protocol.

7  
8 157 **Acknowledgements**

9  
10  
11 158 We would like to acknowledge David Flynn from Boston University Medical Alumni Library for  
12  
13 159 assistance with search terms.

14  
15  
16 160 **Funding statement**

17  
18  
19 161 This work was funded by a fellowship to C.C. by the United States Pharmacopeia.

20  
21  
22 162 **References:**

- 23  
24  
25 163 1 World Health Organization. A Study on the Public Health and Socioeconomic Impact of  
26  
27 Substandard and Falsified medical products. 2017.  
28 164  
29  
30 165 2 Holmes AH, Moore LSP, Steinbakk M, *et al.* Antimicrobials : access and sustainable eff  
31  
32 ectiveness 2, Understanding the mechanisms and drivers of antimicrobial resistance.  
33 166  
34 *Lancet* 2016;**387**. doi:10.1016/S0140-6736(15)00473-0  
35 167  
36  
37 168 3 Andersson DI, Hughes D. Microbiological effects of sublethal levels of antibiotics. *Nat*  
38  
39 *Rev Microbiol* 2014;**12**:465–78. doi:10.1038/nrmicro3270  
40 169  
41  
42 170 4 Zhanel GG, Kim SO, Davidson RJ, *et al.* Effect of subinhibitory concentrations of  
43  
44 Ciprofloxacin and gentamicin on the adherence of *Pseudomonas aeruginosa* to Vero cells  
45  
46 171 and voided uroepithelial cells. *Chemotherapy* 1993;**39**:105–11. doi:10.1159/000239110  
47  
48 172  
49  
50 173 5 Blazquez J, Rodriguez-Beltran J, Matic I. Antibiotic-Induced Genetic Variation: How It  
51  
52 Arises and How It Can Be Prevented. In: Gottesman S, ed. *Annual Review of*  
53  
54 174 *Microbiology, Vol 72*. 2018. 209–30. doi:10.1146/annurev-micro-090817-062139  
55  
56 175  
57  
58  
59  
60

- 1  
2  
3 176 6 Broom LJ. The sub-inhibitory theory for antibiotic growth promoters. *Poult Sci*  
4  
5 177 2007;:3104–8. doi:10.3382/ps/pex114  
6  
7  
8 178 7 Ouzzani M, Hammady H, Fedorowicz Z, *et al.* Rayyan-a web and mobile app for  
9  
10 179 systematic reviews. *Syst Rev* 2016;5:1–10. doi:10.1186/s13643-016-0384-4  
11  
12  
13 180 8 Hooijmans CR, Rovers MM, Vries RBM De, *et al.* SYRCLE 's risk of bias tool for  
14  
15 181 animal studies. 2014;:1–9.  
16  
17  
18 182 9 Thomas BH, Ciliska D, Dobbins M, *et al.* A Process for Systematically Reviewing the  
19  
20 183 Literature : Providing the Research Evidence for Public Health Nursing Interventions.  
21  
22 184 2004.  
23  
24  
25  
26 185  
27  
28  
29  
30  
31  
32  
33  
34  
35  
36  
37  
38  
39  
40  
41  
42  
43  
44  
45  
46  
47  
48  
49  
50  
51  
52  
53  
54  
55  
56  
57  
58  
59  
60



## Appendix 2: Search Terms

### PUBMED

Search Term\*:

((quinolone) AND (subinhibitory OR sub-inhibitory OR "sub inhibitory" OR sub-lethal OR sublethal OR "sub lethal" OR subminimal OR sub-minimal OR "sub minimal" OR subminimum OR sub-minimum OR "sub minimum" OR sub-therapeutic OR subtherapeutic OR "sub therapeutic" OR "sub MIC" OR sub-mic OR low-dose OR "low dose" OR substandard OR "sub standard" OR sub-standard OR counterfeit OR falsified)) AND (Drug Resistance, Microbial OR Antimicrobial Drug Resistance OR Antimicrobial Drug Resistances OR Antibiotic Resistance OR Microbial Antibiotic Resistance OR Resistance, Antibiotic OR Resistance OR Resistant OR Mutagenesis OR Mutation OR Mutagenicity OR Gene expression OR transcription or transcriptional)

Complete Search Term:

((("quinolones"[MeSH Terms] OR "quinolones"[All Fields] OR "quinolone"[All Fields]) AND (subinhibitory[All Fields] OR sub-inhibitory[All Fields] OR "sub inhibitory"[All Fields] OR sub-lethal[All Fields] OR sublethal[All Fields] OR "sub lethal"[All Fields] OR subminimal[All Fields] OR sub-minimal[All Fields] OR "sub minimal"[All Fields] OR subminimum[All Fields] OR sub-minimum[All Fields] OR "sub minimum"[All Fields] OR sub-therapeutic[All Fields] OR subtherapeutic[All Fields] OR "sub therapeutic"[All Fields] OR "sub MIC"[All Fields] OR sub-mic[All Fields] OR low-dose[All Fields] OR "low dose"[All Fields] OR substandard[All Fields] OR "sub standard"[All Fields] OR sub-standard[All Fields] OR counterfeit[All Fields] OR falsified[All Fields])) AND (("drug resistance, microbial"[MeSH Terms] OR ("drug"[All Fields] AND "resistance"[All Fields] AND "microbial"[All Fields]) OR "microbial drug resistance"[All Fields] OR ("drug"[All Fields] AND "resistance"[All Fields] AND "microbial"[All Fields]) OR "drug resistance, microbial"[All Fields] OR ("drug resistance, microbial"[MeSH Terms] OR ("drug"[All Fields] AND "resistance"[All Fields] AND "microbial"[All Fields]) OR "microbial drug resistance"[All Fields] OR ("antimicrobial"[All Fields] AND "drug"[All Fields] AND "resistance"[All Fields]) OR "antimicrobial drug resistance"[All Fields] OR ("drug resistance, microbial"[MeSH Terms] OR ("drug"[All Fields] AND "resistance"[All Fields] AND "microbial"[All Fields]) OR "microbial drug resistance"[All Fields] OR ("antibiotic"[All Fields] AND "resistance"[All Fields]) OR "antibiotic resistance"[All Fields]) OR (Microbial[All Fields] AND ("drug resistance, microbial"[MeSH Terms] OR ("drug"[All Fields] AND "resistance"[All Fields] AND "microbial"[All Fields]) OR "microbial drug resistance"[All Fields] OR ("antibiotic"[All Fields] AND "resistance"[All Fields]) OR "antibiotic resistance"[All Fields])) OR ("drug resistance, microbial"[MeSH Terms] OR ("drug"[All Fields] AND "resistance"[All Fields] AND "microbial"[All Fields]) OR "microbial drug resistance"[All Fields] OR ("resistance"[All Fields] AND "antibiotic"[All Fields]) OR "resistance, antibiotic"[All Fields]) OR Resistance[All Fields] OR Resistant[All Fields] OR ("mutagenesis"[MeSH Terms] OR "mutagenesis"[All Fields]) OR ("mutation"[MeSH Terms] OR "mutation"[All Fields]) OR Mutagenicity[All Fields] OR ("gene expression"[MeSH Terms] OR ("gene"[All Fields] AND "expression"[All Fields]) OR "gene expression"[All Fields]) OR ("transcription, genetic"[MeSH Terms] OR ("transcription"[All Fields] AND "genetic"[All Fields]) OR "genetic transcription"[All Fields] OR "transcription"[All Fields]) OR ("transcription, genetic"[MeSH Terms] OR ("transcription"[All Fields] AND "genetic"[All Fields]) OR "genetic transcription"[All Fields] OR "transcriptional"[All Fields]))))

### Web of Science

Search Term\*:

1  
2  
3  
4  
5  
6  
7  
8  
9  
10  
11  
12  
13  
14  
15  
16  
17  
18  
19  
20  
21  
22  
23  
24  
25  
26  
27  
28  
29  
30  
31  
32  
33  
34  
35  
36  
37  
38  
39  
40  
41  
42  
43  
44  
45  
46  
47  
48  
49  
50  
51  
52  
53  
54  
55  
56  
57  
58  
59  
60

TS=(quinolone\* OR fluoroquinolone\* OR ciprofloxacin OR norfloxacin OR ofloxacin OR levofloxacin OR moxifloxacin OR gemifloxacin or enrofloxacin) AND TS=(subinhibitory OR sub-inhibitory OR "sub inhibitory" OR sub-lethal OR sublethal OR "sub lethal" OR subminimal OR sub-minimal OR "sub minimal" OR subminimum OR sub-minimum OR "sub minimum" OR sub-therapeutic OR subtherapeutic OR "sub therapeutic" OR "sub MIC" OR sub-mic OR low-dose OR "low dose" OR substandard OR "sub standard" OR sub-standard OR counterfeit OR falsified) AND TS=(Drug Resistance, Microbial OR Antimicrobial Drug Resistance OR Antimicrobial Drug Resistances OR Antibiotic Resistance OR Microbial Antibiotic Resistance OR Resistance, Antibiotic OR Resistance OR Resistant OR Mutagenesis OR Mutation OR Mutagenicity OR Gene expression OR transcription or transcriptional)

### **Embase**

Search Term\*:

(subinhibitory OR 'sub inhibitory' OR 'sub-lethal' OR sublethal OR 'sub lethal' OR subminimal OR 'sub-minimal' OR 'sub minimal' OR subminimum OR 'sub-minimum' OR 'sub minimum' OR 'sub-therapeutic' OR subtherapeutic OR 'sub therapeutic' OR 'sub mic' OR 'sub-mic' OR 'low-dose' OR 'low dose' OR substandard OR 'sub standard' OR 'sub-standard' OR counterfeit OR falsified) AND ('quinoline derived antiinfective agent'/exp OR 'anti infective agents, fluoroquinolone' OR 'anti infective agents, quinolone' OR 'anti-infective agents, fluoroquinolone' OR 'anti-infective agents, quinolone' OR 'antibiotics, quinolones' OR 'chinolone antibiotic' OR 'fluoroquinolone (antibiotic)' OR 'fluoroquinolone antibiotic' OR 'fluoroquinolone antibiotic agent' OR 'fluoroquinolone antiinfective agent' OR 'fluoroquinolone antimicrobial agent' OR 'quinoline derived antiinfective agent' OR 'quinolone (antibiotic)' OR 'quinolone antibiotic' OR 'quinolone antibiotics' OR 'quinolone antiinfective agent') AND ('antibiotic resistance'/exp OR 'antibacterial drug resistance' OR 'antibacterial resistance' OR 'antibiotic resistance' OR 'antimicrobial drug resistance' OR 'antimicrobial resistance' OR 'bacterial drug resistance' OR 'bacterial resistance' OR 'bacterium resistance' OR 'drug resistance, bacterial' OR 'drug resistance, microbial' OR 'microbial drug resistance' OR 'resistance' OR 'resistant' OR 'gene expression'/exp OR 'expression, gene' OR 'gene expression' OR 'genetic expression' OR 'genome expression' OR 'genetic transcription'/exp OR transcription OR transcriptional)

**\*Amendment** – While gene expression is included in the above search terms, gene expression will be excluded from the outcomes.

## Appendix 1. PRISMA-P (Preferred Reporting Items for Systematic review and Meta-Analysis Protocols) 2015 checklist: recommended items to address in a systematic review protocol\*

| Section and topic                 | Item No | Checklist item                                                                                                                                                                                                                | (Page No.#)      |
|-----------------------------------|---------|-------------------------------------------------------------------------------------------------------------------------------------------------------------------------------------------------------------------------------|------------------|
| <b>ADMINISTRATIVE INFORMATION</b> |         |                                                                                                                                                                                                                               |                  |
| Title:                            |         |                                                                                                                                                                                                                               |                  |
| Identification                    | 1a      | Identify the report as a protocol of a systematic review                                                                                                                                                                      | 1                |
| Update                            | 1b      | If the protocol is for an update of a previous systematic review, identify as such                                                                                                                                            | N/A              |
| Registration                      | 2       | If registered, provide the name of the registry (such as PROSPERO) and registration number                                                                                                                                    | 5                |
| Authors:                          |         |                                                                                                                                                                                                                               |                  |
| Contact                           | 3a      | Provide name, institutional affiliation, e-mail address of all protocol authors; provide physical mailing address of corresponding author                                                                                     | 1                |
| Contributions                     | 3b      | Describe contributions of protocol authors and identify the guarantor of the review                                                                                                                                           | 12               |
| Amendments                        | 4       | If the protocol represents an amendment of a previously completed or published protocol, identify as such and list changes; otherwise, state plan for documenting important protocol amendments                               | N/A              |
| Support:                          |         |                                                                                                                                                                                                                               |                  |
| Sources                           | 5a      | Indicate sources of financial or other support for the review                                                                                                                                                                 | 12               |
| Sponsor                           | 5b      | Provide name for the review funder and/or sponsor                                                                                                                                                                             |                  |
| Role of sponsor or funder         | 5c      | Describe roles of funder(s), sponsor(s), and/or institution(s), if any, in developing the protocol                                                                                                                            |                  |
| <b>INTRODUCTION</b>               |         |                                                                                                                                                                                                                               |                  |
| Rationale                         | 6       | Describe the rationale for the review in the context of what is already known                                                                                                                                                 | 3-4              |
| Objectives                        | 7       | Provide an explicit statement of the question(s) the review will address with reference to participants, interventions, comparators, and outcomes (PICO)                                                                      | 4                |
| <b>METHODS</b>                    |         |                                                                                                                                                                                                                               |                  |
| Eligibility criteria              | 8       | Specify the study characteristics (such as PICO, study design, setting, time frame) and report characteristics (such as years considered, language, publication status) to be used as criteria for eligibility for the review | 5-7              |
| Information sources               | 9       | Describe all intended information sources (such as electronic databases, contact with study authors, trial registers or other grey literature sources) with planned dates of coverage                                         | 7                |
| Search strategy                   | 10      | Present draft of search strategy to be used for at least one electronic database, including planned limits, such that it could be repeated                                                                                    | 8 and Appendix 1 |

|                                    |     |                                                                                                                                                                                                                                                  |       |
|------------------------------------|-----|--------------------------------------------------------------------------------------------------------------------------------------------------------------------------------------------------------------------------------------------------|-------|
| Study records:                     |     |                                                                                                                                                                                                                                                  |       |
| Data management                    | 11a | Describe the mechanism(s) that will be used to manage records and data throughout the review                                                                                                                                                     | 8     |
| Selection process                  | 11b | State the process that will be used for selecting studies (such as two independent reviewers) through each phase of the review (that is, screening, eligibility and inclusion in meta-analysis)                                                  | 8     |
| Data collection process            | 11c | Describe planned method of extracting data from reports (such as piloting forms, done independently, in duplicate), any processes for obtaining and confirming data from investigators                                                           | 7-8   |
| Data items                         | 12  | List and define all variables for which data will be sought (such as PICO items, funding sources), any pre-planned data assumptions and simplifications                                                                                          | 5-7   |
| Outcomes and prioritization        | 13  | List and define all outcomes for which data will be sought, including prioritization of main and additional outcomes, with rationale                                                                                                             | 7-8   |
| Risk of bias in individual studies | 14  | Describe anticipated methods for assessing risk of bias of individual studies, including whether this will be done at the outcome or study level, or both; state how this information will be used in data synthesis                             | 9-11  |
| Data synthesis                     | 15a | Describe criteria under which study data will be quantitatively synthesised                                                                                                                                                                      | 11-12 |
|                                    | 15b | If data are appropriate for quantitative synthesis, describe planned summary measures, methods of handling data and methods of combining data from studies, including any planned exploration of consistency (such as $I^2$ , Kendall's $\tau$ ) |       |
|                                    | 15c | Describe any proposed additional analyses (such as sensitivity or subgroup analyses, meta-regression)                                                                                                                                            |       |
|                                    | 15d | If quantitative synthesis is not appropriate, describe the type of summary planned                                                                                                                                                               |       |
| Meta-bias(es)                      | 16  | Specify any planned assessment of meta-bias(es) (such as publication bias across studies, selective reporting within studies)                                                                                                                    | 12    |
| Confidence in cumulative evidence  | 17  | Describe how the strength of the body of evidence will be assessed (such as GRADE)                                                                                                                                                               | 12    |

**\* It is strongly recommended that this checklist be read in conjunction with the PRISMA-P Explanation and Elaboration (cite when available) for important clarification on the items. Amendments to a review protocol should be tracked and dated. The copyright for PRISMA-P (including checklist) is held by the PRISMA-P Group and is distributed under a Creative Commons Attribution Licence 4.0.**

*From: Shamseer L, Moher D, Clarke M, Ghersi D, Liberati A, Petticrew M, Shekelle P, Stewart L, PRISMA-P Group. Preferred reporting items for systematic review and meta-analysis protocols (PRISMA-P) 2015: elaboration and explanation. BMJ. 2015 Jan 2;349(jan02 1):g7647.*

# BMJ Open

## Bacterial antibiotic resistance development and mutagenesis following exposure to sub-minimal inhibitory concentrations of fluoroquinolones *in vitro*: a systematic literature review protocol

|                                 |                                                                                                                                                                                                                                                                                           |
|---------------------------------|-------------------------------------------------------------------------------------------------------------------------------------------------------------------------------------------------------------------------------------------------------------------------------------------|
| Journal:                        | <i>BMJ Open</i>                                                                                                                                                                                                                                                                           |
| Manuscript ID                   | bmjopen-2019-030747.R1                                                                                                                                                                                                                                                                    |
| Article Type:                   | Protocol                                                                                                                                                                                                                                                                                  |
| Date Submitted by the Author:   | 09-Sep-2019                                                                                                                                                                                                                                                                               |
| Complete List of Authors:       | Ching, Carly; Boston University, Biomedical Engineering<br>Orubu, Ebiowei; Boston University, Institute for Health System Innovation & Policy<br>Wirtz, Veronika; Boston University School of Public Health, Global Health<br>Zaman, Muhammad ; Boston University, Biomedical Engineering |
| <b>Primary Subject Heading</b>: | Infectious diseases                                                                                                                                                                                                                                                                       |
| Secondary Subject Heading:      | Genetics and genomics                                                                                                                                                                                                                                                                     |
| Keywords:                       | Microbiology < BASIC SCIENCES, INFECTIOUS DISEASES, Health policy < HEALTH SERVICES ADMINISTRATION & MANAGEMENT                                                                                                                                                                           |
|                                 |                                                                                                                                                                                                                                                                                           |

SCHOLARONE™  
Manuscripts

1  
2  
3 1  
4  
5  
6 2  
7  
8  
9 3  
10  
11  
12 4  
13  
14  
15 5 **Bacterial antibiotic resistance development and mutagenesis following exposure to sub-**  
16  
17 6 **minimal inhibitory concentrations of fluoroquinolones *in vitro*: a systematic literature**  
18  
19 7 **review protocol**  
20  
21  
22  
23 8•

24  
25 9 Carly Ching<sup>1</sup>, Ebiowei S.F. Orubu<sup>2</sup>, Veronika J. Wirtz<sup>3</sup>, Muhammad H. Zaman<sup>1,4\*</sup>  
26  
27

28 10 <sup>1</sup>Department of Biomedical Engineering, Boston University, Boston, MA, USA <sup>2</sup>Institute for  
29 11 Health System Innovation & Policy, Boston University, Boston, MA, USA <sup>3</sup>Department of  
30 12 Global Health, Boston University School of Public Health, Boston, MA, USA <sup>4</sup>Howard Hughes  
31 13 Medical Institute, Boston University, Boston, MA USA  
32  
33

34 14  
35  
36 15• \* Muhammad H. Zaman

37  
38 16• Department of Biomedical Engineering

39  
40 17 Boston University,

41  
42 18 44 Cummington Mall

43  
44 19 Boston, Massachusetts 02215

45  
46 20 617-358-5881

47  
48 21 zaman@bu.edu  
49

50 22•  
51  
52 23• Word Count: 1832 (excluding tables)  
53  
54  
55 24

1  
2  
3 **25 ABSTRACT**  
4  
5  
6

7 **26 Introduction:** Antibiotic resistance (AR) is among the most pressing global health challenges.  
8  
9 **27** Fluoroquinolones are a clinically important group of antibiotics that have wide applicability in  
10  
11 **28** both humans and animals. While many drivers of AR are known, the impact of medicine quality  
12  
13 **29** on AR remains largely unknown. The aim of this review is to systematically evaluate the evidence  
14  
15 **30** of the impact of *in vitro* sub-inhibitory antibiotic exposure, a major tenet of substandard antibiotics,  
16  
17 **31** on the development of AR and mutagenesis, using fluoroquinolones as a case study.  
18  
19  
20

21 **32 Methods and analysis:** EMBASE, Web of Science and PubMed will be systematically searched  
22  
23 **33** for primary experimental *in vitro* studies, from earliest available dates within each database (1947,  
24  
25 **34** 1965 and 1966, respectively) through 2018, related to sub-inhibitory fluoroquinolone exposure  
26  
27 **35** and AR. A specifically developed non-weighted tool will be used to critically assess the evidence.  
28  
29 **36** Subgroup analyses will be performed for different variables and outcomes.  
30  
31  
32

33  
34 **37 Ethics and dissemination:** Ethical approval is not required as no primary data is to be collected.  
35  
36 **38** The completed systematic review will be disseminated through conference meeting presentations  
37  
38 **39** and a peer-reviewed publication.  
39  
40  
41

42  
43  
44  
45  
46  
47  
48  
49  
50  
51  
52  
53  
54  
55  
56  
57  
58  
59  
60

## 44 STRENGTHS AND LIMITATIONS OF THIS STUDY

- 45 • This study aims to be the first systematic review of this body of evidence.
- 46 • NCBI PubMed, ISI Web of Science and Elsevier Embase will be searched for impact of  
47 sub-inhibitory concentrations of fluoroquinolones on antimicrobial resistance from earliest  
48 available dates within each database through 2018 without language limitation.
- 49 • Basic microbiological experimental studies will be reviewed following Preferred  
50 Reporting Items for Systematic Review and Meta-Analyses (PRISMA) protocol standards,  
51 which is currently not best practice.
- 52 • Data will be placed in the context of the important global health issue of medicine quality,  
53 with broad implications in mortality, morbidity and antibiotic resistance. The knowledge  
54 afforded by the review can provide a foundation for further research studies on substandard  
55 antibiotics.
- 56 • Review is limited to *in vitro* studies of bacterial monocultures, limiting translation to the  
57 clinic.

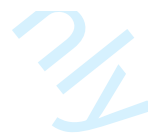



## 59 INTRODUCTION

60 Antibiotic resistance (AR) is a rapidly growing global health threat. To provide evidence for  
61 improved clinical and public health interventions and policies, it is paramount to understand both  
62 the social drivers of AR development and the underlying scientific contributors. These drivers  
63 include antibiotic usage in the environment and the clinic, as well as access and quality of  
64 antibiotics[1,2].

65 Poor-quality antibiotics, specifically substandard antibiotics, is one possible understudied driver  
66 of antibiotic resistance [3]. Substandard drugs are defined by the World Health Organization as  
67 “*authorized medical products that fail to meet either their quality standards or their specifications,*  
68 *or both*” [3]. The prevalence, or failure rate, of substandard antibiotics and other anti-infectives in  
69 low and middle income countries has been reported to be about 7% [3]. Prevalence estimates are  
70 currently limited to low and middle-income countries, with more data needed for high-income  
71 countries [4]. Substandard antibiotic products often contain inadequate levels of the active  
72 pharmaceutical ingredient (API) (not falling within the stated concentration or quality standards)  
73 or have lower than expected/specified bioavailability arising from poor dissolution. This can result  
74 in the treatment of bacteria at sub-inhibitory concentrations below their minimal inhibitory  
75 concentration (MIC). In this case, there is not enough API to completely clear the bacterial  
76 infection but there may be enough API to provide selective pressure for AR development. Thus,  
77 medicine quality may be a potentially important driver of AR, however there is currently a lack of  
78 direct evidence to support this hypothesis [5].

79 While systematic reviews of observational studies provide critical evidence for developing clinical  
80 interventions and public health policies, there is a lack of a similar systematic approach in reviews  
81 of experimental bench research – the science which underlies and explains what occurs clinically.

1  
2  
3 82 To identify important scientific trends and bring awareness to the topic of medicine quality, we  
4  
5 83 have extracted an underlying scientific question for a systematic review: Does sub-inhibitory  
6  
7  
8 84 fluoroquinolone exposure increase bacterial antibiotic resistance development and mutagenesis?  
9

10  
11 85 Here, we seek to systematically synthesize and critically appraise experimental evidence on how  
12  
13 86 sub-inhibitory concentrations of one specific class of antibiotics, fluoroquinolones, impacts AR.  
14

15 87 We have chosen fluoroquinolones as they are a commonly used classes of antibiotics, effective  
16  
17 88 against both Gram-negative and Gram-positive bacteria, in both human and animals. Resistance  
18  
19 89 emergence against fluoroquinolones has been widely reported for several decades[6–9]. Second to  
20  
21  
22 90 fourth-generation fluoroquinolones stem from the initial non-fluorinated first-generation  
23  
24 91 quinolone class; these synthetic molecules are technically classified as antimicrobial agents and  
25  
26  
27 92 share a bicyclic quinolone-related core structure, with a fluorine on the sixth or seventh carbon  
28  
29 93 position. For this review, we will refer to fluoroquinolones as antibiotics [9–11]. In addition to  
30  
31 94 substandard antibiotic exposure clinically, bacteria are exposed to sub-inhibitory antibiotic  
32  
33  
34 95 concentrations in other situations, such as in the environment from wastewaters or agricultural  
35  
36 96 soils which can have implications in AR development and transmittance [12].  
37  
38

39 97 Currently, there are only a few broad narrative literature reviews on the impacts of sub-inhibitory  
40  
41 98 concentrations of antibiotics [13–16]. To our knowledge, there are currently few to no systematic  
42  
43  
44 99 reviews of basic or fundamental microbiological bench research [17,18]. Thus, we seek to perform  
45  
46 100 an unbiased systematic literature review using Preferred Reporting Items for Systematic Review  
47  
48 101 and Meta-Analyses (PRISMA) guidelines on the topic of sub-inhibitory fluoroquinolone exposure  
49  
50  
51 102 and AR development.  
52

53 103 The results of this systematic review will contribute to the understanding of the impact of exposure  
54  
55  
56 104 of bacteria to sub-inhibitory levels of fluoroquinolones on antibiotic resistance acquisition.  
57  
58  
59

1  
2  
3 105 Secondly, we seek to identify gaps in evidence related to medicine quality in an effort to inform  
4  
5 106 policy-making on the control of substandard medicines. This work can contribute to a rigorous  
6  
7 107 evidence-base of bench research based on systematic review including critical appraisal of existing  
8  
9 108 literature instead of narrative review and selective reporting.  
10  
11  
12

### 13 109 **Systematic review questions**

14  
15  
16 110 This review seeks to address the following questions:  
17  
18

- 19 111 1. Does sub-inhibitory fluoroquinolone exposure increase bacterial antibiotic resistance  
20  
21 112 development and mutagenesis *in vitro*? (Primary)
- 22  
23 113 2. What is the potential for substandard fluoroquinolone drugs to lead to antibiotic resistance  
24  
25 114 development? (Secondary)

### 26 27 28 115 **METHODS**

29  
30  
31 116 Our methodology will conform to the PRISMA reporting standards (Appendix 1, PRISMA-P  
32  
33 117 Checklist). The protocol does not currently exist elsewhere and is ineligible for hosting on  
34  
35 118 PROSPERO because it the study participants are not people or animals. The duration of this study  
36  
37 119 is estimated to be six months.  
38  
39  
40

### 41 120 **Patient and Public Involvement**

42  
43  
44 121 It was not appropriate or possible to involve patients or the public in this work.  
45  
46

### 47 122 **Eligibility Criteria**

48  
49  
50 123 To define the search approach and inclusion and exclusion criteria we applied a Population  
51  
52 124 Intervention Comparator Outcome Study (PICOS) search tool. The criteria is presented in Table.  
53  
54 125 1.

126 **Table 1. Population Intervention Comparator Outcome Study (PICOS) Design Criteria**

|                                | <b>Include</b>                                                                                                                                                                                                                                                                                                                  | <b>Exclude</b>                                                                                                                                                                                                                                                                                                                                                                                                                                                                       |
|--------------------------------|---------------------------------------------------------------------------------------------------------------------------------------------------------------------------------------------------------------------------------------------------------------------------------------------------------------------------------|--------------------------------------------------------------------------------------------------------------------------------------------------------------------------------------------------------------------------------------------------------------------------------------------------------------------------------------------------------------------------------------------------------------------------------------------------------------------------------------|
| <b>Population</b>              | <ul style="list-style-type: none"> <li>Bacteria (All isolates of Gram-negative and Gram-positive species)lab/domesticated strains</li> </ul>                                                                                                                                                                                    | <ul style="list-style-type: none"> <li>Eukaryotes (All)</li> <li>Archaea</li> </ul>                                                                                                                                                                                                                                                                                                                                                                                                  |
| <b>Intervention (Exposure)</b> | <ul style="list-style-type: none"> <li>Exposure with ranges of fluoroquinolone (second to fourth-generation) concentrations with levels below the defined MIC*, under controlled <i>in vitro</i> experimental conditions.</li> </ul> <p>* defined as the concentration visibly inhibiting growth in the experimental set-up</p> | <ul style="list-style-type: none"> <li>Exposure to first-generation quinolone antibiotics (i.e. nalidixic acid) or other classes of antibiotics</li> <li>Exposure to first-generation quinolone antibiotics, for example nalidixic acid, or other classes of antibiotics.</li> <li>Exposure to sub-MIC fluoroquinolone concentrations in combination with another class of antibiotic or compound</li> <li>Purely computational models</li> <li>Studies involving animals</li> </ul> |
| <b>Comparator</b>              | <ul style="list-style-type: none"> <li>No treatment, MIC at 0% API of parental strain</li> </ul>                                                                                                                                                                                                                                |                                                                                                                                                                                                                                                                                                                                                                                                                                                                                      |

|                            |                                                                                                                                                                                                                                                                                                                                                                                                                                                                                                                                                                        |                                                                                                                                                                                                                                                                                                                                                                                                        |
|----------------------------|------------------------------------------------------------------------------------------------------------------------------------------------------------------------------------------------------------------------------------------------------------------------------------------------------------------------------------------------------------------------------------------------------------------------------------------------------------------------------------------------------------------------------------------------------------------------|--------------------------------------------------------------------------------------------------------------------------------------------------------------------------------------------------------------------------------------------------------------------------------------------------------------------------------------------------------------------------------------------------------|
| <p><b>Outcomes</b></p>     | <ul style="list-style-type: none"> <li>Quantitative experimental microbiological data related to:           <ul style="list-style-type: none"> <li>(1) resistance acquisition (to same or other antibiotic) and (2) mutagenesis rate</li> </ul> </li> <li>Examples of data include standard microbiological assays (i.e. phenotypical tests, commercially available antibiotic susceptibility tests and molecular and PCR assays for identification of mutations)</li> <li>Whether any mention of substandard of medicine quality within the paper (yes/no)</li> </ul> | <ul style="list-style-type: none"> <li>Outcomes from studies that treat bacteria with sub-inhibitory levels but do not follow-up with results related to resistance acquisition or mutagenesis. Examples of results to exclude include community behavior, such as surface cell adhesion and biofilm formation, virulence (persister formation, toxin/antitoxin systems) and plasmid curing</li> </ul> |
| <p><b>Study Design</b></p> | <ul style="list-style-type: none"> <li>Primary Experimental Studies (All Languages) published from 1966-2018 on NCBI PubMed, from 1965-2018 on ISI Web of Science and from 1947 - 2018 on Elsevier Embase</li> </ul>                                                                                                                                                                                                                                                                                                                                                   | <ul style="list-style-type: none"> <li>Conference abstracts</li> <li>Review articles (no primary data)</li> <li>Observational Studies</li> </ul>                                                                                                                                                                                                                                                       |

127 MIC=minimum inhibitory concentration, API=active pharmaceutical ingredients,

128 PCR=polymerase chasin reaction

## 129 **Outcomes, Prioritization and Data Extraction**

130 The primary outcome extracted will be the effect of exposure to sub-inhibitory concentrations of  
131 fluoroquinolones on (1) antibiotic resistance acquisition (mono-resistance and multi-drug  
132 resistance) and (2) mutagenesis. A secondary outcome extracted will be whether these papers  
133 discuss substandard or poor quality medicines. Our rationale for prioritization is that we first need  
134 to determine the link between exposure and resistance acquisition. After quantifying and  
135 evaluating the evidence, we aim to assess how frequently primary scientific papers mention or  
136 discuss medicine quality. Other variables extracted from each study will include year of  
137 publication, bacterial species and number of strains, type of bacterial isolate (clinically isolated vs  
138 reference strain), drug name and concentration, and study design (duration of exposure, growth  
139 conditions, etc.). Study quality and limitations after quality assessment, and gaps in evidence for  
140 review questions will also be extracted. Data will be extracted to a standardized Excel table. The  
141 data will be summarized and standardized as described in the Data Synthesis section.

142 Each paper will be analyzed and key results extracted to a standardized table for comparison by a  
143 single reviewer. For a random sample of 10% of the publications, a second reviewer will extract  
144 the data. The results will be compared with the first. If the interrater reliability is moderate or low  
145 all data extraction will be done independently by two reviewers.

## 146 **Search Strategy**

147 The search strategy was based on study objectives and a preliminary search of PUBMED to  
148 determine relevant Medical Subject Headings (MeSH) terms. Using MeSH terms and keyword  
149 synonyms along with identified terms for sub-inhibitory and substandard, a search strategy was  
150 designed in PUBMED and translated to Web of Science and Embase to search all fields for articles

1  
2  
3 151 that fit the inclusion criteria above (Table 1). Identified search terms are listed below. Search  
4  
5 152 strings were designed with a medical librarian. Additional records will be identified through  
6  
7  
8 153 searching the bibliographies of already-identified papers and searching through papers that have  
9  
10 154 cited key studies. The complete search terms are provided in Appendix 2.

11  
12  
13 155 Identified terms: *subinhibitory, sub-inhibitory, sub inhibitory, sub-lethal, sublethal, sub lethal,*  
14  
15 156 *subminimal, sub-minimal, sub minimal, sub-therapeutic, subtherapeutic, sub therapeutic, sub*  
16  
17 157 *MIC, sub-MIC, low-dose, low dose, substandard, sub-standard, counterfeit, falsified*

### 18 19 20 21 158 **Study records**

22  
23  
24 159 Records will be managed through reference management software Endnote and Mendeley.  
25  
26 160 Additionally, search histories will be saved. Abstract screening and selection of studies will be  
27  
28 161 performed by two independent reviewers using software Rayyan QCRI [19]. A third researcher  
29  
30 162 will resolve discrepancies between reviewers selections. The full text of articles from the initial  
31  
32  
33 163 screening will be reviewed for inclusion.

### 34 35 36 164 **Risk of bias in individual studies**

37  
38  
39 165 Risk of bias for laboratory microbiology experimentation will be assessed with criteria formulated  
40  
41 166 by considering and adapting the Systematic Review Centre for Laboratory animal Experimentation  
42  
43 167 (SYRCLE)'s risk of bias tool for animal studies [20] and the Effective Public Health Practice  
44  
45 168 Project (EPHPP) quality assessment tool [21]. The criteria is presented in Table 2. Here, we present  
46  
47  
48 169 a non-weighted assessment of individual study quality, including risk of bias. For each of five  
49  
50 170 domains, studies will be assessed for a series of criteria listed below. For each unmet review criteria  
51  
52  
53 171 within the domain an increased risk of bias point will be assigned. The more points assigned, the  
54  
55 172 higher the risk of bias associated with the study. There will be no defined cut-off for exclusion of

173 papers, in order for the review to be reflective of the evidence base as a whole. This will allow us  
 174 to determine how strong the body of evidence is as a whole and to perform a qualitative assessment  
 175 of the most frequent types of gaps in quality to inform recommendations for future studies. Papers  
 176 will also have to meet a minimum criteria of ability to extract data on methods and results; e.g.  
 177 appropriate quantitative numerical data on study outcome.

178 **Table 2. Criteria for assessment of the quality of laboratory microbiology experimentation**

| Domain                         | Description of domain                                                                                                                                                                      | Review Criteria                                                                                                                                                                                                                                            |
|--------------------------------|--------------------------------------------------------------------------------------------------------------------------------------------------------------------------------------------|------------------------------------------------------------------------------------------------------------------------------------------------------------------------------------------------------------------------------------------------------------|
| Selection and confounding bias | Describe possible genetic or environmental variations to determine how results for different strains of the same species can be compared. For clinical isolates, genotype is not required. | <ul style="list-style-type: none"> <li>• Were the groups compared individually or were differences discussed in the analysis?</li> <li>• Were species and strain details provided?</li> </ul>                                                              |
| Study Design/Methods           | Reproducibility and detail of study design and methods. Description of analysis methods.                                                                                                   | <ul style="list-style-type: none"> <li>• Are there any discrepancies between methods and in-text?</li> <li>• Is the methodological section missing any steps or appropriate detail ? (including but not limited to below)</li> </ul> <p>Steps/Details:</p> |



| Domain                                          | Description of domain                                                                                                  | Review Criteria                                                                                                                                                                                                                                                                                                 |
|-------------------------------------------------|------------------------------------------------------------------------------------------------------------------------|-----------------------------------------------------------------------------------------------------------------------------------------------------------------------------------------------------------------------------------------------------------------------------------------------------------------|
|                                                 |                                                                                                                        | <ul style="list-style-type: none"> <li>-media used</li> <li>-temperature</li> <li>-time</li> <li>-incubation conditions (static, rolling, shaking, aeration)</li> <li>- reagents used</li> <li>- concentrations used</li> <li>- appropriate control experiments</li> <li>-replication of experiments</li> </ul> |
| <p>Incomplete outcome data (Attrition Bias)</p> | <p>Describe the completeness of outcome data being analyzed, including attrition and exclusions from the analysis.</p> | <ul style="list-style-type: none"> <li>• Is there missing outcome data that was not addressed?</li> <li>• Is the control outcome data mentioned in the paper present?</li> </ul>                                                                                                                                |
| <p>Selective outcome reporting</p>              | <p>Reporting of aim and all outcomes of the study.</p>                                                                 | <ul style="list-style-type: none"> <li>• Was all data reported for all conditions or just select/statistically significant results?</li> </ul>                                                                                                                                                                  |

| Domain                | Description of domain                                                 | Review Criteria                                                                                                                                                                                                                       |
|-----------------------|-----------------------------------------------------------------------|---------------------------------------------------------------------------------------------------------------------------------------------------------------------------------------------------------------------------------------|
| (Reporting bias)      |                                                                       | <ul style="list-style-type: none"> <li>• Was it clear whether no change results were reported?</li> <li>• Was statistical significance noted (if possible)?</li> <li>• Is the appropriate comparison to baseline provided?</li> </ul> |
| Other sources of bias | State any important concerns about bias not covered by other domains. | <ul style="list-style-type: none"> <li>• Was the study apparently free of concerns about bias?</li> </ul>                                                                                                                             |
| Global Bias Rating    | Summary of all five domains                                           | Calculate total quality points. The more points the higher the risk of bias.                                                                                                                                                          |

179

## 180 Data Synthesis

181 Meta-analysis may not be possible based on findings and will be defined by the limitations of the  
 182 raw data extracted. It will be dependent on the magnitude of heterogeneity between independent  
 183 studies and ability to assign an effect-size that would be appropriate. If heterogeneity is too large  
 184 meta-analyses will not be performed in order to avoid over-interpretation. If we cannot assign a  
 185 true appropriate control group and true “sample size”, meta-analysis will also not be possible.  
 186 However, despite these potential limitations this is a novel review of experimental evidence that  
 187 aims to provide a comprehensive synthesis of data that is much more complete than one individual

1  
2  
3 188 study and which may reveal trends. It is clear that more tools need to be developed to move the  
4  
5 189 field of basic science towards systematic reviews.

6  
7  
8 190 If meta-analysis is not appropriate, quantitative sub-group analyses and summarization will be  
9  
10 191 performed. The following protocol, in brief, will be used: Data will be extracted into a standardized  
11  
12 192 Excel spreadsheet. From here, data will be sorted and grouped for each independent variable, such  
13  
14 193 as bacterial species, concentration of exposure and antibiotic. The dependent outcome of change  
15  
16 194 in resistance and mutagenesis will be plotted against these variables. The values of outcomes  
17  
18 195 (relative change in resistance) will be binned. This will allow us to determine the range and  
19  
20 196 frequency of magnitudes of resistance changes given different concentrations and different  
21  
22 197 antibiotics.

#### 23 24 25 26 198 **Meta-bias(es)**

27  
28  
29 199 Based on data synthesis parameters, the overall quality of the body of evidence will be determined,  
30  
31 200 if possible. Since we will not be able to make direct clinical recommendations due to the limitations  
32  
33 201 of our review being focused on *in-vitro* studies we will focus on confidence in our overall summary  
34  
35 202 of results and trends. For this we will take into account publication bias across studies including  
36  
37 203 any potential publication biases in authors or types of studies, biases towards certain bacteria,  
38  
39 204 antibiotics and selective outcomes. Contrastingly, narrative literature reviews of basic science  
40  
41 205 typically do not critically assess the bias of each study and hence, do not take into account quality  
42  
43 206 in their summary which is an important limitation of narrative reviews. We will use GRADE  
44  
45 207 (Grading of Recommendations, Assessment, Development and Evaluations) guidelines on  
46  
47 208 publication bias to aid us in rating the quality of our evidence [22]. Additionally inconsistencies  
48  
49 209 in methodology and outcomes will be assessed and taken into account in determining the  
50  
51 210 confidence of our reported data summary.

1  
2  
3 **211 Ethics and Dissemination**  
4

5  
6 212 Ethical approval is not required as no primary data is to be collected. The completed systematic  
7  
8 213 review will be disseminated through conference meeting presentations and a peer-reviewed  
9  
10 214 publication.  
11  
12

13  
14 **215 Authors Contributions**  
15

16 216 C.C., V.J.W and M.H.Z. initiated work. C.C., E.S.F.O., V.J.W and M.H.Z designed and wrote  
17  
18 217 protocol.  
19  
20

21  
22 **218 Acknowledgements**  
23

24  
25 219 We would like to acknowledge David Flynn from Boston University Medical Alumni Library for  
26  
27 220 assistance with search terms and members of the Zaman lab for their input and feedback.  
28  
29

30 **221 Funding statement**  
31

32  
33 222 This work was funded by a fellowship to C.C. by the United States Pharmacopeia.  
34  
35

36 **223 Competing Interests**  
37

38  
39 224 The authors declare no competing interests.  
40  
41

42 **225 References:**  
43

- 44  
45 226 1 Chatterjee A, Modarai M, Naylor NR, *et al.* Review Quantifying drivers of antibiotic  
46  
47 227 resistance in humans : a systematic review. *Lancet Infect Dis* 2018;**18**:e368–78.  
48  
49 228 doi:10.1016/S1473-3099(18)30296-2  
50  
51  
52 229 2 Okeke IN, Klugman KP, Bhutta ZA, *et al.* Antimicrobial resistance in developing  
53  
54 230 countries. Part II: Strategies for containment. *Lancet Infect Dis* 2005;**5**:568–80.  
55  
56  
57  
58  
59  
60

- 1  
2  
3 231 doi:10.1016/S1473-3099(05)70217-6  
4  
5  
6 232 3 World Health Organization. A Study on the Public Health and Socieconomic Impact of  
7  
8 233 Substandard and Falsified medical products. 2017.  
9  
10  
11 234 4 World Health Organization. A Study on the Public Health and Socieconomic Impact of  
12  
13 235 Substandard and Falsified medical products, Executive Summary. 2017;:1–29.  
14  
15  
16 236 5 Holmes AH, Moore LSP, Steinbakk M, *et al.* Antimicrobials : access and sustainable eff  
17  
18 237 ectiveness 2, Understanding the mechanisms and drivers of antimicrobial resistance.  
19  
20 238 *Lancet* 2016;**387**. doi:10.1016/S0140-6736(15)00473-0  
21  
22  
23  
24 239 6 Kim ES, Hooper DC. Clinical importance and epidemiology of quinolone resistance.  
25  
26 240 *Infect Chemother* 2014;**46**:226–38. doi:10.3947/ic.2014.46.4.226  
27  
28  
29 241 7 McEwen SA, Fedorka-Cray PJ. Antimicrobial Use and Resistance in Animals. *Clin Infect*  
30  
31 242 *Dis* 2002;**34**:Supplement.  
32  
33  
34  
35 243 8 Acar JF, Goldstein FW. Trends in Bacterial Resistance to Fluoroquinolones. *Clin Infect*  
36  
37 244 *Dis* 1999;**24**.  
38  
39  
40 245 9 Dalhoff A. Global Fluoroquinolone Resistance Epidemiology and Implications for Clinical  
41  
42 246 Use. *Interdiscip Persepctives Infect Dsiseases* 2012;**2012**. doi:10.1155/2012/976273  
43  
44  
45 247 10 Tillotson GS. Quinolones: Structure-activity relationships and future predictions. *J Med*  
46  
47 248 *Microbiol* 1996;**44**:320–4. doi:10.1099/00222615-44-5-320  
48  
49  
50  
51 249 11 Redgrave LS, Sutton SB, Webber MA, *et al.* Fluoroquinolone resistance : mechanisms ,  
52  
53 250 impact on bacteria , and role in evolutionary success. *Trends Microbiol* 2014;**22**:438–45.  
54  
55 251 doi:10.1016/j.tim.2014.04.007  
56  
57  
58  
59  
60

- 1  
2  
3 252 12 Van Doorslaer X, Dewulf J, Van Langenhove H, *et al.* Fluoroquinolone antibiotics: An  
4  
5 253 emerging class of environmental micropollutants. *Sci Total Environ* 2014;**500–501**:250–  
6  
7 254 69. doi:10.1016/j.scitotenv.2014.08.075  
8  
9  
10 255 13 Andersson DI, Hughes D. Microbiological effects of sublethal levels of antibiotics. *Nat*  
11  
12 256 *Rev Microbiol* 2014;**12**:465–78. doi:10.1038/nrmicro3270  
13  
14  
15  
16 257 14 Zhanel GG, Kim SO, Davidson RJ, *et al.* Effect of subinhibitory concentrations of  
17  
18 258 Ciprofloxacin and gentamicin on the adherence of *Pseudomonas aeruginosa* to Vero cells  
19  
20 259 and voided uroepithelial cells. *Chemotherapy* 1993;**39**:105–11. doi:10.1159/000239110  
21  
22  
23 260 15 Blazquez J, Rodriguez-Beltran J, Matic I. Antibiotic-Induced Genetic Variation: How It  
24  
25 261 Arises and How It Can Be Prevented. In: Gottesman S, ed. *Annual Review of*  
26  
27 262 *Microbiology, Vol 72*. 2018. 209–30. doi:10.1146/annurev-micro-090817-062139  
28  
29  
30  
31 263 16 Broom LJ. The sub-inhibitory theory for antibiotic growth promoters. *Poult Sci*  
32  
33 264 2007;**3**:104–8. doi:10.3382/ps/pex114  
34  
35  
36 265 17 Hagan ECO, Matalon S, Riesenber LA. Systematic reviews of the literature : a better  
37  
38 266 way of addressing basic science controversies. 2018;**2017–20**.  
39  
40 267 doi:10.1152/ajplung.00544.2017  
41  
42  
43  
44 268 18 Editorial. Why basic microbiology still matters. *Nat Rev Microbiol* 2011;**9**:480.  
45  
46 269 doi:10.1038/nrmicro2611  
47  
48  
49 270 19 Ouzzani M, Hammady H, Fedorowicz Z, *et al.* Rayyan-a web and mobile app for  
50  
51 271 systematic reviews. *Syst Rev* 2016;**5**:1–10. doi:10.1186/s13643-016-0384-4  
52  
53  
54 272 20 Hooijmans CR, Rovers MM, Vries RBM De, *et al.* SYRCLE 's risk of bias tool for  
55  
56  
57  
58  
59  
60

1  
2  
3 273 animal studies. 2014;:1–9.  
4  
5

6 274 21 Thomas BH, Ciliska D, Dobbins M, *et al.* A Process for Systematically Reviewing the  
7  
8 275 Literature : Providing the Research Evidence for Public Health Nursing Interventions.  
9  
10 276 2004.  
11  
12

13 277 22 Nolting A, Perleth M, Langer G, *et al.* GRADE guidelines: 5. Rating the quality of  
14  
15 278 evidence - Publication bias. *Z Evid Fortbild Qual Gesundheitswes* 2012;**106**:670–6.  
16  
17 279 doi:10.1016/j.zefq.2012.10.015  
18  
19

20  
21 280  
22  
23  
24  
25  
26  
27  
28  
29  
30  
31  
32  
33  
34  
35  
36  
37  
38  
39  
40  
41  
42  
43  
44  
45  
46  
47  
48  
49  
50  
51  
52  
53  
54  
55  
56  
57  
58  
59  
60

## Appendix 1. PRISMA-P (Preferred Reporting Items for Systematic review and Meta-Analysis Protocols) 2015 checklist: recommended items to address in a systematic review protocol\*

| Section and topic                 | Item No | Checklist item                                                                                                                                                                                  | (Page No.#)                                                                    |
|-----------------------------------|---------|-------------------------------------------------------------------------------------------------------------------------------------------------------------------------------------------------|--------------------------------------------------------------------------------|
| <b>ADMINISTRATIVE INFORMATION</b> |         |                                                                                                                                                                                                 |                                                                                |
| Title:                            |         |                                                                                                                                                                                                 |                                                                                |
| Identification                    | 1a      | Identify the report as a protocol of a systematic review                                                                                                                                        | 1                                                                              |
| Update                            | 1b      | If the protocol is for an update of a previous systematic review, identify as such                                                                                                              | N/A                                                                            |
| Registration                      | 2       | If registered, provide the name of the registry (such as PROSPERO) and registration number                                                                                                      | 6 (ineligible for PROSPERO hosting because subjects are not humans or animals) |
| Authors:                          |         |                                                                                                                                                                                                 |                                                                                |
| Contact                           | 3a      | Provide name, institutional affiliation, e-mail address of all protocol authors; provide physical mailing address of corresponding author                                                       | 1                                                                              |
| Contributions                     | 3b      | Describe contributions of protocol authors and identify the guarantor of the review                                                                                                             | 15                                                                             |
| Amendments                        | 4       | If the protocol represents an amendment of a previously completed or published protocol, identify as such and list changes; otherwise, state plan for documenting important protocol amendments | N/A                                                                            |
| Support:                          |         |                                                                                                                                                                                                 |                                                                                |
| Sources                           | 5a      | Indicate sources of financial or other support for the review                                                                                                                                   | 15                                                                             |
| Sponsor                           | 5b      | Provide name for the review funder and/or sponsor                                                                                                                                               |                                                                                |
| Role of sponsor or funder         | 5c      | Describe roles of funder(s), sponsor(s), and/or institution(s), if any, in developing the protocol                                                                                              |                                                                                |
| <b>INTRODUCTION</b>               |         |                                                                                                                                                                                                 |                                                                                |
| Rationale                         | 6       | Describe the rationale for the review in the context of what is already known                                                                                                                   | 4-6                                                                            |
| Objectives                        | 7       | Provide an explicit statement of the question(s) the review will address with reference to participants, interventions, comparators, and outcomes (PICO)                                        | 6                                                                              |
| <b>METHODS</b>                    |         |                                                                                                                                                                                                 |                                                                                |
| Eligibility criteria              | 8       | Specify the study characteristics (such as PICO, study design, setting, time frame) and report characteristics (such as years                                                                   | 7-8                                                                            |



|                                    |     |                                                                                                                                                                                                                                                  |                     |
|------------------------------------|-----|--------------------------------------------------------------------------------------------------------------------------------------------------------------------------------------------------------------------------------------------------|---------------------|
|                                    |     | considered, language, publication status) to be used as criteria for eligibility for the review                                                                                                                                                  |                     |
| Information sources                | 9   | Describe all intended information sources (such as electronic databases, contact with study authors, trial registers or other grey literature sources) with planned dates of coverage                                                            | 8                   |
| Search strategy                    | 10  | Present draft of search strategy to be used for at least one electronic database, including planned limits, such that it could be repeated                                                                                                       | 9-10 and Appendix 2 |
| Study records:                     |     |                                                                                                                                                                                                                                                  |                     |
| Data management                    | 11a | Describe the mechanism(s) that will be used to manage records and data throughout the review                                                                                                                                                     | 10                  |
| Selection process                  | 11b | State the process that will be used for selecting studies (such as two independent reviewers) through each phase of the review (that is, screening, eligibility and inclusion in meta-analysis)                                                  | 10                  |
| Data collection process            | 11c | Describe planned method of extracting data from reports (such as piloting forms, done independently, in duplicate), any processes for obtaining and confirming data from investigators                                                           | 8-9                 |
| Data items                         | 12  | List and define all variables for which data will be sought (such as PICO items, funding sources), any pre-planned data assumptions and simplifications                                                                                          | 7-8                 |
| Outcomes and prioritization        | 13  | List and define all outcomes for which data will be sought, including prioritization of main and additional outcomes, with rationale                                                                                                             | 8-9                 |
| Risk of bias in individual studies | 14  | Describe anticipated methods for assessing risk of bias of individual studies, including whether this will be done at the outcome or study level, or both; state how this information will be used in data synthesis                             | 10-13               |
| Data synthesis                     | 15a | Describe criteria under which study data will be quantitatively synthesised                                                                                                                                                                      | 13-14               |
|                                    | 15b | If data are appropriate for quantitative synthesis, describe planned summary measures, methods of handling data and methods of combining data from studies, including any planned exploration of consistency (such as $I^2$ , Kendall's $\tau$ ) |                     |
|                                    | 15c | Describe any proposed additional analyses (such as sensitivity or subgroup analyses, meta-regression)                                                                                                                                            |                     |
|                                    | 15d | If quantitative synthesis is not appropriate, describe the type of summary planned                                                                                                                                                               |                     |
| Meta-bias(es)                      | 16  | Specify any planned assessment of meta-bias(es) (such as publication bias across studies, selective reporting within studies)                                                                                                                    | 14                  |
| Confidence in cumulative evidence  | 17  | Describe how the strength of the body of evidence will be assessed (such as GRADE)                                                                                                                                                               | 14                  |

**\* It is strongly recommended that this checklist be read in conjunction with the PRISMA-P Explanation and Elaboration (cite when available) for important clarification on the items. Amendments to a review protocol should be tracked and dated. The copyright for PRISMA-P (including checklist) is held by the PRISMA-P Group and is distributed under a Creative Commons Attribution Licence 4.0.**

*From: Shamseer L, Moher D, Clarke M, Ghersi D, Liberati A, Petticrew M, Shekelle P, Stewart L, PRISMA-P Group. Preferred reporting items for systematic review and meta-analysis protocols (PRISMA-P) 2015: elaboration and explanation. BMJ. 2015 Jan 2;349(jan02 1):g7647.*

## Appendix 2: Search Terms

### PUBMED

Search Term\*:

((quinolone) AND (subinhibitory OR sub-inhibitory OR "sub inhibitory" OR sub-lethal OR sublethal OR "sub lethal" OR subminimal OR sub-minimal OR "sub minimal" OR subminimum OR sub-minimum OR "sub minimum" OR sub-therapeutic OR subtherapeutic OR "sub therapeutic" OR "sub MIC" OR sub-mic OR low-dose OR "low dose" OR substandard OR "sub standard" OR sub-standard OR counterfeit OR falsified)) AND (Drug Resistance, Microbial OR Antimicrobial Drug Resistance OR Antimicrobial Drug Resistances OR Antibiotic Resistance OR Microbial Antibiotic Resistance OR Resistance, Antibiotic OR Resistance OR Resistant OR Mutagenesis OR Mutation OR Mutagenicity OR Gene expression OR transcription or transcriptional)

Complete Search Term:

((("quinolones"[MeSH Terms] OR "quinolones"[All Fields] OR "quinolone"[All Fields]) AND (subinhibitory[All Fields] OR sub-inhibitory[All Fields] OR "sub inhibitory"[All Fields] OR sub-lethal[All Fields] OR sublethal[All Fields] OR "sub lethal"[All Fields] OR subminimal[All Fields] OR sub-minimal[All Fields] OR "sub minimal"[All Fields] OR subminimum[All Fields] OR sub-minimum[All Fields] OR "sub minimum"[All Fields] OR sub-therapeutic[All Fields] OR subtherapeutic[All Fields] OR "sub therapeutic"[All Fields] OR "sub MIC"[All Fields] OR sub-mic[All Fields] OR low-dose[All Fields] OR "low dose"[All Fields] OR substandard[All Fields] OR "sub standard"[All Fields] OR sub-standard[All Fields] OR counterfeit[All Fields] OR falsified[All Fields])) AND (("drug resistance, microbial"[MeSH Terms] OR ("drug"[All Fields] AND "resistance"[All Fields] AND "microbial"[All Fields]) OR "microbial drug resistance"[All Fields] OR ("drug"[All Fields] AND "resistance"[All Fields] AND "microbial"[All Fields]) OR "drug resistance, microbial"[All Fields] OR ("drug resistance, microbial"[MeSH Terms] OR ("drug"[All Fields] AND "resistance"[All Fields] AND "microbial"[All Fields]) OR "microbial drug resistance"[All Fields] OR ("antimicrobial"[All Fields] AND "drug"[All Fields] AND "resistance"[All Fields]) OR "antimicrobial drug resistance"[All Fields] OR ("drug resistance, microbial"[MeSH Terms] OR ("drug"[All Fields] AND "resistance"[All Fields] AND "microbial"[All Fields]) OR "microbial drug resistance"[All Fields] OR ("antibiotic"[All Fields] AND "resistance"[All Fields]) OR "antibiotic resistance"[All Fields]) OR (Microbial[All Fields] AND ("drug resistance, microbial"[MeSH Terms] OR ("drug"[All Fields] AND "resistance"[All Fields] AND "microbial"[All Fields]) OR "microbial drug resistance"[All Fields] OR ("antibiotic"[All Fields] AND "resistance"[All Fields]) OR "antibiotic resistance"[All Fields])) OR ("drug resistance, microbial"[MeSH Terms] OR ("drug"[All Fields] AND "resistance"[All Fields] AND "microbial"[All Fields]) OR "microbial drug resistance"[All Fields] OR ("resistance"[All Fields] AND "antibiotic"[All Fields]) OR "resistance, antibiotic"[All Fields]) OR Resistance[All Fields] OR Resistant[All Fields] OR ("mutagenesis"[MeSH Terms] OR "mutagenesis"[All Fields]) OR ("mutation"[MeSH Terms] OR "mutation"[All Fields]) OR Mutagenicity[All Fields] OR ("gene expression"[MeSH Terms] OR ("gene"[All Fields] AND "expression"[All Fields]) OR "gene expression"[All Fields]) OR ("transcription, genetic"[MeSH Terms] OR ("transcription"[All Fields] AND "genetic"[All Fields]) OR "genetic transcription"[All Fields] OR "transcription"[All Fields]) OR ("transcription, genetic"[MeSH Terms] OR ("transcription"[All Fields] AND "genetic"[All Fields]) OR "genetic transcription"[All Fields] OR "transcriptional"[All Fields]))))

### Web of Science

Search Term\*:

1  
2  
3  
4  
5  
6  
7  
8  
9  
10  
11  
12  
13  
14  
15  
16  
17  
18  
19  
20  
21  
22  
23  
24  
25  
26  
27  
28  
29  
30  
31  
32  
33  
34  
35  
36  
37  
38  
39  
40  
41  
42  
43  
44  
45  
46  
47  
48  
49  
50  
51  
52  
53  
54  
55  
56  
57  
58  
59  
60

TS=(quinolone\* OR fluoroquinolone\* OR ciprofloxacin OR norfloxacin OR ofloxacin OR levofloxacin OR moxifloxacin OR gemifloxacin or enrofloxacin) AND TS=(subinhibitory OR sub-inhibitory OR "sub inhibitory" OR sub-lethal OR sublethal OR "sub lethal" OR subminimal OR sub-minimal OR "sub minimal" OR subminimum OR sub-minimum OR "sub minimum" OR sub-therapeutic OR subtherapeutic OR "sub therapeutic" OR "sub MIC" OR sub-mic OR low-dose OR "low dose" OR substandard OR "sub standard" OR sub-standard OR counterfeit OR falsified) AND TS=(Drug Resistance, Microbial OR Antimicrobial Drug Resistance OR Antimicrobial Drug Resistances OR Antibiotic Resistance OR Microbial Antibiotic Resistance OR Resistance, Antibiotic OR Resistance OR Resistant OR Mutagenesis OR Mutation OR Mutagenicity OR Gene expression OR transcription or transcriptional)

### **Embase**

Search Term\*:

(subinhibitory OR 'sub inhibitory' OR 'sub-lethal' OR sublethal OR 'sub lethal' OR subminimal OR 'sub-minimal' OR 'sub minimal' OR subminimum OR 'sub-minimum' OR 'sub minimum' OR 'sub-therapeutic' OR subtherapeutic OR 'sub therapeutic' OR 'sub mic' OR 'sub-mic' OR 'low-dose' OR 'low dose' OR substandard OR 'sub standard' OR 'sub-standard' OR counterfeit OR falsified) AND ('quinoline derived antiinfective agent'/exp OR 'anti infective agents, fluoroquinolone' OR 'anti infective agents, quinolone' OR 'anti-infective agents, fluoroquinolone' OR 'anti-infective agents, quinolone' OR 'antibiotics, quinolones' OR 'chinolone antibiotic' OR 'fluoroquinolone (antibiotic)' OR 'fluoroquinolone antibiotic' OR 'fluoroquinolone antibiotic agent' OR 'fluoroquinolone antiinfective agent' OR 'fluoroquinolone antimicrobial agent' OR 'quinoline derived antiinfective agent' OR 'quinolone (antibiotic)' OR 'quinolone antibiotic' OR 'quinolone antibiotics' OR 'quinolone antiinfective agent') AND ('antibiotic resistance'/exp OR 'antibacterial drug resistance' OR 'antibacterial resistance' OR 'antibiotic resistance' OR 'antimicrobial drug resistance' OR 'antimicrobial resistance' OR 'bacterial drug resistance' OR 'bacterial resistance' OR 'bacterium resistance' OR 'drug resistance, bacterial' OR 'drug resistance, microbial' OR 'microbial drug resistance' OR 'resistance' OR 'resistant' OR 'gene expression'/exp OR 'expression, gene' OR 'gene expression' OR 'genetic expression' OR 'genome expression' OR 'genetic transcription'/exp OR transcription OR transcriptional)

**\*Amendment** – While gene expression is included in the above search terms, gene expression will be excluded from the outcomes.

# BMJ Open

## Bacterial antibiotic resistance development and mutagenesis following exposure to sub-minimal inhibitory concentrations of fluoroquinolones *in vitro*: a systematic literature review protocol

|                                 |                                                                                                                                                                                                                                                                                           |
|---------------------------------|-------------------------------------------------------------------------------------------------------------------------------------------------------------------------------------------------------------------------------------------------------------------------------------------|
| Journal:                        | <i>BMJ Open</i>                                                                                                                                                                                                                                                                           |
| Manuscript ID                   | bmjopen-2019-030747.R2                                                                                                                                                                                                                                                                    |
| Article Type:                   | Protocol                                                                                                                                                                                                                                                                                  |
| Date Submitted by the Author:   | 07-Oct-2019                                                                                                                                                                                                                                                                               |
| Complete List of Authors:       | Ching, Carly; Boston University, Biomedical Engineering<br>Orubu, Ebiowei; Boston University, Institute for Health System Innovation & Policy<br>Wirtz, Veronika; Boston University School of Public Health, Global Health<br>Zaman, Muhammad ; Boston University, Biomedical Engineering |
| <b>Primary Subject Heading</b>: | Infectious diseases                                                                                                                                                                                                                                                                       |
| Secondary Subject Heading:      | Genetics and genomics, Public health                                                                                                                                                                                                                                                      |
| Keywords:                       | Microbiology < BASIC SCIENCES, INFECTIOUS DISEASES, Health policy < HEALTH SERVICES ADMINISTRATION & MANAGEMENT                                                                                                                                                                           |
|                                 |                                                                                                                                                                                                                                                                                           |

SCHOLARONE™  
Manuscripts

1  
2  
3 1  
4  
5  
6 2  
7  
8  
9 3  
10  
11  
12 4  
13  
14  
15 5 **Bacterial antibiotic resistance development and mutagenesis following exposure to sub-**  
16  
17 6 **minimal inhibitory concentrations of fluoroquinolones *in vitro*: a systematic literature**  
18  
19 **review protocol**  
20 7  
21  
22  
23 8•

24  
25 9 Carly Ching<sup>1</sup>, Ebiowei S.F. Orubu<sup>2</sup>, Veronika J. Wirtz<sup>3</sup>, Muhammad H. Zaman<sup>1,4\*</sup>  
26  
27

28 10 <sup>1</sup>Department of Biomedical Engineering, Boston University, Boston, MA, USA <sup>2</sup>Institute for  
29 11 Health System Innovation & Policy, Boston University, Boston, MA, USA <sup>3</sup>Department of  
30 12 Global Health, Boston University School of Public Health, Boston, MA, USA <sup>4</sup>Howard Hughes  
31 13 Medical Institute, Boston University, Boston, MA USA  
32  
33  
34 14

35  
36 15• \* Muhammad H. Zaman  
37

38 16• Department of Biomedical Engineering  
39

40 17 Boston University,  
41

42 18 44 Cummington Mall  
43

44 19 Boston, Massachusetts 02215  
45

46 20 617-358-5881  
47

48 21 zaman@bu.edu  
49

50 22•  
51  
52 23• Word Count: 1832 (excluding tables)  
53  
54  
55 24  
56  
57  
58  
59  
60

1  
2  
3 **25 ABSTRACT**  
4  
5  
6

7 **26 Introduction:** Antibiotic resistance (AR) is among the most pressing global health challenges.  
8  
9 **27** Fluoroquinolones are a clinically important group of antibiotics that have wide applicability in  
10  
11 **28** both humans and animals. While many drivers of AR are known, the impact of medicine quality  
12  
13 **29** on AR remains largely unknown. The aim of this review is to systematically evaluate the evidence  
14  
15 **30** of the impact of *in vitro* sub-inhibitory antibiotic exposure, a major tenet of substandard antibiotics,  
16  
17 **31** on the development of AR and mutagenesis, using fluoroquinolones as a case study.  
18  
19  
20

21 **32 Methods and analysis:** EMBASE, Web of Science and PubMed will be systematically searched  
22  
23 **33** for primary experimental *in vitro* studies, from earliest available dates within each database (1947,  
24  
25 **34** 1965 and 1966, respectively) through 2018, related to sub-inhibitory fluoroquinolone exposure  
26  
27 **35** and AR. A specifically developed non-weighted tool will be used to critically assess the evidence.  
28  
29 **36** Subgroup analyses will be performed for different variables and outcomes.  
30  
31  
32

33  
34 **37 Ethics and dissemination:** Ethical approval is not required as no primary data is to be collected.  
35  
36 **38** The completed systematic review will be disseminated through conference meeting presentations  
37  
38 **39** and a peer-reviewed publication.  
39  
40  
41

42  
43  
44  
45  
46  
47  
48  
49  
50  
51  
52  
53  
54  
55  
56  
57  
58  
59  
60

## 44 STRENGTHS AND LIMITATIONS OF THIS STUDY

- 45 • This study aims to be the first systematic review of this body of evidence.
- 46 • NCBI PubMed, ISI Web of Science and Elsevier Embase will be searched for impact of  
47 sub-inhibitory concentrations of fluoroquinolones on antimicrobial resistance from earliest  
48 available dates within each database through 2018 without language limitation.
- 49 • Basic microbiological experimental studies will be reviewed following Preferred  
50 Reporting Items for Systematic Review and Meta-Analyses (PRISMA) protocol standards,  
51 which is currently not best practice.
- 52 • Data will be placed in the context of the important global health issue of medicine quality,  
53 with broad implications in mortality, morbidity and antibiotic resistance. The knowledge  
54 afforded by the review can provide a foundation for further research studies on substandard  
55 antibiotics.
- 56 • Review is limited to *in vitro* studies of bacterial monocultures, limiting translation to the  
57 clinic.



## 59 INTRODUCTION

60 Antibiotic resistance (AR) is a rapidly growing global health threat. To provide evidence for  
61 improved clinical and public health interventions and policies, it is paramount to understand both  
62 the social drivers of AR development and the underlying scientific mechanisms. These drivers  
63 include antibiotic usage in the environment and the clinic, as well as access and quality of  
64 antibiotics[1,2].

65 Poor-quality antibiotics, specifically substandard antibiotics, is one possible understudied driver  
66 of antibiotic resistance [3]. Substandard drugs are defined by the World Health Organization as  
67 “*authorized medical products that fail to meet either their quality standards or their specifications,*  
68 *or both*” [3]. The prevalence, or failure rate, of substandard antibiotics and other anti-infectives in  
69 low and middle income countries has been reported to be about 7% [3]. Prevalence estimates are  
70 currently limited to low and middle-income countries, with more data needed for high-income  
71 countries [4]. Substandard antibiotic products often contain inadequate levels of the active  
72 pharmaceutical ingredient (API) (not falling within the stated concentration or quality standards)  
73 or have lower than expected/specified bioavailability arising from poor dissolution. This can result  
74 in the treatment of bacteria at sub-inhibitory concentrations below their minimal inhibitory  
75 concentration (MIC). In this case, there is not enough API to completely clear the bacterial  
76 infection but there may be enough API to provide selective pressure for AR development. Thus,  
77 medicine quality may be a potentially important driver of AR, however there is currently a lack of  
78 direct evidence to support this hypothesis [5].

79 While systematic reviews of observational studies provide critical evidence for developing clinical  
80 interventions and public health policies, there is a lack of a similar systematic approach in reviews  
81 of experimental bench research – the science which underlies and explains what occurs clinically.



1  
2  
3 82 To identify important scientific trends and bring awareness to the topic of medicine quality, we  
4  
5 83 have extracted an underlying scientific question for a systematic review: Does sub-inhibitory  
6  
7 84 fluoroquinolone exposure increase bacterial antibiotic resistance development and mutagenesis?  
8  
9

10  
11 85 Here, we seek to systematically synthesize and critically appraise experimental evidence on how  
12  
13 86 sub-inhibitory concentrations of one specific class of antibiotics, fluoroquinolones, impacts AR.  
14

15 87 We have chosen fluoroquinolones as they are a commonly used classes of antibiotics, effective  
16  
17 88 against both Gram-negative and Gram-positive bacteria, in both human and animals. Resistance  
18  
19 89 emergence against fluoroquinolones has been widely reported for several decades[6–9]. Second to  
20  
21 90 fourth-generation fluoroquinolones stem from the initial non-fluorinated first-generation  
22  
23 91 quinolone class; these synthetic molecules are technically classified as antimicrobial agents and  
24  
25 92 share a bicyclic quinolone-related core structure, with a fluorine on the sixth or seventh carbon  
26  
27 93 position. For this review, we will refer to fluoroquinolones as antibiotics [9–11]. In addition to  
28  
29 94 substandard antibiotic exposure clinically, bacteria are exposed to sub-inhibitory antibiotic  
30  
31 95 concentrations in other situations, such as in the environment from wastewaters or agricultural  
32  
33 96 soils which can have implications in AR development and transmittance [12].  
34  
35  
36  
37  
38

39 97 Currently, there are only a few broad narrative literature reviews on the impacts of sub-inhibitory  
40  
41 98 concentrations of antibiotics [13–16]. To our knowledge, there are currently few systematic  
42  
43 99 reviews of basic or fundamental microbiological bench research [17–19]. Thus, we seek to perform  
44  
45 100 an unbiased systematic literature review according to Preferred Reporting Items for Systematic  
46  
47 101 Review and Meta-Analyses (PRISMA) guidelines on the topic of sub-inhibitory fluoroquinolone  
48  
49 102 exposure and AR development.  
50  
51  
52

53 103 The results of this systematic review will contribute to the understanding of the impact of exposure  
54  
55 104 of bacteria to sub-inhibitory levels of fluoroquinolones on antibiotic resistance acquisition.  
56  
57  
58  
59  
60

1  
2  
3 105 Secondly, we seek to identify gaps in evidence related to medicine quality in an effort to inform  
4  
5 106 policy-making on the control of substandard medicines. This work can contribute to a rigorous  
6  
7 107 evidence-base of bench research based on systematic review including critical appraisal of existing  
8  
9 108 literature instead of narrative review and selective reporting.  
10  
11  
12

### 13 109 **Systematic review questions**

14  
15  
16 110 This review seeks to address the following questions:  
17  
18

- 19 111 1. Does sub-inhibitory fluoroquinolone exposure increase bacterial antibiotic resistance  
20  
21 112 development and mutagenesis *in vitro*? (Primary)
- 22  
23 113 2. What is the potential for substandard fluoroquinolone drugs to lead to antibiotic resistance  
24  
25 114 development? (Secondary)

### 26 27 28 115 **METHODS**

29  
30  
31 116 Our methodology will conform to the PRISMA reporting standards (Appendix 1, PRISMA-P  
32  
33 117 Checklist). The protocol does not currently exist elsewhere and is ineligible for hosting on  
34  
35 118 PROSPERO because it the study participants are not people or animals. The duration of this study  
36  
37 119 is estimated to be six months.  
38  
39  
40

### 41 120 **Patient and Public Involvement**

42  
43  
44 121 It was not appropriate or possible to involve patients or the public in this work.  
45  
46

### 47 122 **Eligibility Criteria**

48  
49  
50 123 To define the search approach and inclusion and exclusion criteria we applied a Population  
51  
52 124 Intervention Comparator Outcome Study (PICOS) search tool. The criteria is presented in Table.  
53  
54 125 1.

126 **Table 1. Population Intervention Comparator Outcome Study (PICOS) Design Criteria**

|                                | <b>Include</b>                                                                                                                                                                                                                                                                                                                                                                                                                            | <b>Exclude</b>                                                                                                                                                                                                                                                                                                                                                                                                                                                                       |
|--------------------------------|-------------------------------------------------------------------------------------------------------------------------------------------------------------------------------------------------------------------------------------------------------------------------------------------------------------------------------------------------------------------------------------------------------------------------------------------|--------------------------------------------------------------------------------------------------------------------------------------------------------------------------------------------------------------------------------------------------------------------------------------------------------------------------------------------------------------------------------------------------------------------------------------------------------------------------------------|
| <b>Population</b>              | <ul style="list-style-type: none"> <li>Bacteria (All isolates of Gram-negative and Gram-positive species)lab/domesticated strains</li> </ul>                                                                                                                                                                                                                                                                                              | <ul style="list-style-type: none"> <li>Eukaryotes (All)</li> <li>Archaea</li> </ul>                                                                                                                                                                                                                                                                                                                                                                                                  |
| <b>Intervention (Exposure)</b> | <ul style="list-style-type: none"> <li>Exposure to ranges of fluoroquinolone (second to fourth-generation) concentrations with levels below the defined MIC*, under controlled <i>in vitro</i> experimental conditions.</li> </ul> <p>* Defined as the concentration visibly inhibiting growth in the experimental set-up. Methods employed would include broth and agar dilution methods and commercially available MIC test strips.</p> | <ul style="list-style-type: none"> <li>Exposure to first-generation quinolone antibiotics (i.e. nalidixic acid) or other classes of antibiotics</li> <li>Exposure to first-generation quinolone antibiotics, for example nalidixic acid, or other classes of antibiotics.</li> <li>Exposure to sub-MIC fluoroquinolone concentrations in combination with another class of antibiotic or compound</li> <li>Purely computational models</li> <li>Studies involving animals</li> </ul> |
| <b>Comparator</b>              | <ul style="list-style-type: none"> <li>No treatment, MIC at 0% API of parental strain</li> </ul>                                                                                                                                                                                                                                                                                                                                          |                                                                                                                                                                                                                                                                                                                                                                                                                                                                                      |

|                            |                                                                                                                                                                                                                                                                                                                                                                                                                                                                                                                                                                        |                                                                                                                                                                                                                                                                                                                                                                                                        |
|----------------------------|------------------------------------------------------------------------------------------------------------------------------------------------------------------------------------------------------------------------------------------------------------------------------------------------------------------------------------------------------------------------------------------------------------------------------------------------------------------------------------------------------------------------------------------------------------------------|--------------------------------------------------------------------------------------------------------------------------------------------------------------------------------------------------------------------------------------------------------------------------------------------------------------------------------------------------------------------------------------------------------|
| <p><b>Outcomes</b></p>     | <ul style="list-style-type: none"> <li>Quantitative experimental microbiological data related to:           <ul style="list-style-type: none"> <li>(1) resistance acquisition (to same or other antibiotic) and (2) mutagenesis rate</li> </ul> </li> <li>Examples of data include standard microbiological assays (i.e. phenotypical tests, commercially available antibiotic susceptibility tests and molecular and PCR assays for identification of mutations)</li> <li>Whether any mention of substandard of medicine quality within the paper (yes/no)</li> </ul> | <ul style="list-style-type: none"> <li>Outcomes from studies that treat bacteria with sub-inhibitory levels but do not follow-up with results related to resistance acquisition or mutagenesis. Examples of results to exclude include community behavior, such as surface cell adhesion and biofilm formation, virulence (persister formation, toxin/antitoxin systems) and plasmid curing</li> </ul> |
| <p><b>Study Design</b></p> | <ul style="list-style-type: none"> <li>Primary Experimental Studies (All Languages) published from 1966-2018 on NCBI PubMed, from 1965-2018 on ISI Web of Science and from 1947 - 2018 on Elsevier Embase</li> </ul>                                                                                                                                                                                                                                                                                                                                                   | <ul style="list-style-type: none"> <li>Conference abstracts</li> <li>Review articles (no primary data)</li> <li>Observational Studies</li> </ul>                                                                                                                                                                                                                                                       |

127 MIC=minimum inhibitory concentration, API=active pharmaceutical ingredients,

128 PCR=polymerase chasin reaction

## 129 **Outcomes, Prioritization and Data Extraction**

130 The primary outcome extracted will be the effect of exposure to sub-inhibitory concentrations of  
131 fluoroquinolones on (1) antibiotic resistance acquisition (mono-resistance and multi-drug  
132 resistance) and (2) mutagenesis. A secondary outcome extracted will be whether these papers  
133 discuss substandard or poor quality medicines. Our rationale for prioritization is that we first need  
134 to determine the link between exposure and resistance acquisition. After quantifying and  
135 evaluating the evidence, we aim to assess how frequently primary scientific papers mention or  
136 discuss medicine quality. Other variables extracted from each study will include year of  
137 publication, bacterial species and number of strains, type of bacterial isolate (clinically isolated vs  
138 reference strain), drug name and concentration, and study method (duration of exposure, growth  
139 conditions, etc.). Study quality and limitations after quality assessment, and gaps in evidence for  
140 review questions will also be extracted. Data will be extracted to a standardized Excel table. The  
141 data will be summarized and standardized as described in the Data Synthesis section.

142 Each paper will be analyzed and key results extracted to a standardized table for comparison by a  
143 single reviewer. For a random sample of 10% of the publications, a second reviewer will extract  
144 the data. The results will be compared with the first. If the interrater reliability is moderate or low  
145 all data extraction will be done independently by two reviewers.

## 146 **Search Strategy**

147 The search strategy was based on study objectives and a preliminary search of PUBMED to  
148 determine relevant Medical Subject Headings (MeSH) terms. Using MeSH terms and keyword  
149 synonyms along with identified terms for sub-inhibitory and substandard, a search strategy was  
150 designed in PUBMED and translated to Web of Science and Embase to search all fields for articles

1  
2  
3 151 that fit the inclusion criteria above (Table 1). Identified search terms are listed below. Search  
4  
5 152 strings were designed with a medical librarian. Additional records will be identified through  
6  
7  
8 153 searching the bibliographies of already-identified papers and searching through papers that have  
9  
10 154 cited key studies. The complete search terms are provided in Appendix 2.

11  
12  
13 155 Identified terms: *subinhibitory, sub-inhibitory, sub inhibitory, sub-lethal, sublethal, sub lethal,*  
14  
15 156 *subminimal, sub-minimal, sub minimal, sub-therapeutic, subtherapeutic, sub therapeutic, sub*  
16  
17 157 *MIC, sub-MIC, low-dose, low dose, substandard, sub-standard, counterfeit, falsified*

### 18 19 20 21 158 **Study records**

22  
23  
24 159 Records will be managed through reference management software Endnote and Mendeley.  
25  
26 160 Additionally, search histories will be saved. Abstract screening and selection of studies will be  
27  
28 161 performed by two independent reviewers using software Rayyan QCRI [20]. A third researcher  
29  
30 162 will resolve discrepancies between reviewers selections. The full text of articles from the initial  
31  
32  
33 163 screening will be reviewed for inclusion.

### 34 35 36 164 **Risk of bias in individual studies**

37  
38  
39 165 Risk of bias for laboratory microbiology experimentation will be assessed with criteria formulated  
40  
41 166 by considering and adapting the Systematic Review Centre for Laboratory animal Experimentation  
42  
43 167 (SYRCLE)'s risk of bias tool for animal studies [21] and the Effective Public Health Practice  
44  
45 168 Project (EPHPP) quality assessment tool [22]. The criteria is presented in Table 2. Here, we present  
46  
47  
48 169 a non-weighted assessment of individual study quality, including risk of bias. For each of five  
49  
50 170 domains, studies will be assessed for a series of criteria listed below. For each unmet review criteria  
51  
52 171 within the domain an increased risk of bias point will be assigned. The more points assigned, the  
53  
54  
55 172 higher the risk of bias associated with the study. There will be no defined cut-off for exclusion of

173 papers, in order for the review to be reflective of the evidence base as a whole. This will allow us  
 174 to determine how strong the body of evidence is as a whole and to perform a qualitative assessment  
 175 of the most frequent types of gaps in quality to inform recommendations for future studies. Papers  
 176 will also have to meet a minimum criteria of ability to extract data on methods and results; e.g.  
 177 appropriate quantitative numerical data on study outcome.

178 **Table 2. Criteria for assessment of the quality of laboratory microbiology experimentation**

| Domain                         | Description of domain                                                                                                                                                                      | Review Criteria                                                                                                                                                                                                                                            |
|--------------------------------|--------------------------------------------------------------------------------------------------------------------------------------------------------------------------------------------|------------------------------------------------------------------------------------------------------------------------------------------------------------------------------------------------------------------------------------------------------------|
| Selection and confounding bias | Describe possible genetic or environmental variations to determine how results for different strains of the same species can be compared. For clinical isolates, genotype is not required. | <ul style="list-style-type: none"> <li>• Were the groups compared individually or were differences discussed in the analysis?</li> <li>• Were species and strain details provided?</li> </ul>                                                              |
| Study Design/Methods           | Reproducibility and detail of study design and methods. Description of analysis methods.                                                                                                   | <ul style="list-style-type: none"> <li>• Are there any discrepancies between methods and in-text?</li> <li>• Is the methodological section missing any steps or appropriate detail ? (including but not limited to below)</li> </ul> <p>Steps/Details:</p> |

| <b>Domain</b>                                   | <b>Description of domain</b>                                                                                           | <b>Review Criteria</b>                                                                                                                                                                                                                                                                                          |
|-------------------------------------------------|------------------------------------------------------------------------------------------------------------------------|-----------------------------------------------------------------------------------------------------------------------------------------------------------------------------------------------------------------------------------------------------------------------------------------------------------------|
|                                                 |                                                                                                                        | <ul style="list-style-type: none"> <li>-media used</li> <li>-temperature</li> <li>-time</li> <li>-incubation conditions (static, rolling, shaking, aeration)</li> <li>- reagents used</li> <li>- concentrations used</li> <li>- appropriate control experiments</li> <li>-replication of experiments</li> </ul> |
| <p>Incomplete outcome data (Attrition Bias)</p> | <p>Describe the completeness of outcome data being analyzed, including attrition and exclusions from the analysis.</p> | <ul style="list-style-type: none"> <li>• Is there missing outcome data that was not addressed?</li> <li>• Is the control outcome data mentioned in the paper present?</li> </ul>                                                                                                                                |
| <p>Selective outcome reporting</p>              | <p>Reporting of aim and all outcomes of the study.</p>                                                                 | <ul style="list-style-type: none"> <li>• Was all data reported for all conditions or just select/statistically significant results?</li> </ul>                                                                                                                                                                  |



| Domain                | Description of domain                                                 | Review Criteria                                                                                                                                                                                                                       |
|-----------------------|-----------------------------------------------------------------------|---------------------------------------------------------------------------------------------------------------------------------------------------------------------------------------------------------------------------------------|
| (Reporting bias)      |                                                                       | <ul style="list-style-type: none"> <li>• Was it clear whether no change results were reported?</li> <li>• Was statistical significance noted (if possible)?</li> <li>• Is the appropriate comparison to baseline provided?</li> </ul> |
| Other sources of bias | State any important concerns about bias not covered by other domains. | <ul style="list-style-type: none"> <li>• Was the study apparently free of concerns about bias?</li> </ul>                                                                                                                             |
| Global Bias Rating    | Summary of all five domains                                           | Calculate total quality points. The more points the higher the risk of bias.                                                                                                                                                          |

179

## 180 Data Synthesis

181 Meta-analysis may not be possible based on findings and will be defined by the limitations of the  
 182 raw data extracted. It will be dependent on the magnitude of heterogeneity between independent  
 183 studies and ability to assign an effect-size that would be appropriate. If heterogeneity is too large  
 184 meta-analyses will not be performed in order to avoid over-interpretation. If we cannot assign a  
 185 true appropriate control group and true “sample size”, meta-analysis will also not be possible.  
 186 However, despite these potential limitations this is a novel review of experimental evidence that  
 187 aims to provide a comprehensive synthesis of data that is much more complete than one individual

1  
2  
3 188 study and which may reveal trends. It is clear that more tools need to be developed to move the  
4  
5 189 field of basic science towards systematic reviews.

6  
7  
8 190 Quantitative sub-group analyses and summarization will be performed. The following protocol, in  
9  
10 191 brief, will be used: Data will be extracted into a standardized Excel spreadsheet. From here, data  
11  
12 192 will be sorted and grouped for each independent variable, such as bacterial species, concentration  
13  
14 193 of exposure and antibiotic. The rationale for subgroups is as follows. First, different bacterial  
15  
16 194 species often respond differently to stress or have different genetic responses to different stimuli.  
17  
18 195 For example, the clinically relevant pathogen *Acinetobacter baumannii*, which has a propensity to  
19  
20 196 gain multi-drug resistances, has a different DNA damage response compared to the conserved  
21  
22 197 paradigm of *Escherichia coli* [23]. This impacts how these two bacteria respond to stress and such  
23  
24 198 differences between bacterial species may lead to differences in responses to sub-inhibitory  
25  
26 199 fluoroquinolone exposure. Concentration of exposure is an important factor, as different  
27  
28 200 concentrations may present different selective compartments [24]. Similarly, it is of clinical  
29  
30 201 interest to determine if certain fluoroquinolones impact bacteria differently, given that  
31  
32 202 fluoroquinolones (with different usage and prescription patterns), display differences in  
33  
34 203 pharmacodynamics and resistance profiles [25,26]. The dependent outcome of change in resistance  
35  
36 204 and mutagenesis will be plotted against these factors. The values of outcomes (relative change in  
37  
38 205 resistance) will also be binned. This will allow us to determine the range and frequency of  
39  
40 206 magnitudes of resistance changes given different concentrations and different antibiotics.

#### 41 42 43 44 45 46 47 **Meta-bias(es)**

48  
49  
50 208 Based on data synthesis parameters, the overall quality of the body of evidence will be determined,  
51  
52 209 if possible. Since we will not be able to make direct clinical recommendations due to the limitations  
53  
54 210 of our review being focused on *in-vitro* studies, we will focus on confidence in our overall

1  
2  
3 211 summary of results and trends. For this we will take into account publication bias across studies.  
4  
5 212 Carroll [27] identified how publication bias may exist in scientific literature and described  
6  
7  
8 213 potential solutions, however these are not best practice. Publication bias could arise from, but is  
9  
10 214 not limited to, rejection of negative data, researchers not submitting research that present negative  
11  
12 215 data, publication based on results rather than the quality and rigor of the study design and influence  
13  
14  
15 216 of industry and funding sources. All of these factors can lead to a skewed set of data that does not  
16  
17 217 fully represent the phenomena being investigated. Narrative literature reviews of basic science  
18  
19 218 typically do not critically assess the bias of each study and hence, do not take into account quality  
20  
21 219 in their summary which is an important limitation of narrative reviews. We will use GRADE  
22  
23  
24 220 (Grading of Recommendations, Assessment, Development and Evaluations) guidelines on  
25  
26 221 publication bias to aid us in rating the quality of our evidence [28]. Specifically, to assess  
27  
28 222 publication bias we will look at the group of studies to determine how many studies had increased  
29  
30  
31 223 bias for not reporting negative results, or only reporting statistically significant results. This criteria  
32  
33 224 is already present in our Risk of Bias analysis for individual studies. We will look at the studies  
34  
35 225 that published negative results and determine if there are differences in the impact factor/prestige  
36  
37  
38 226 of journal that they are published in, and whether data is coming from the same research groups.  
39  
40 227 We will also look at the final number of studies and time of publication in order to identify if there  
41  
42 228 is any “lag bias”[28]. Funding sources, specifically frequency of industry funded studies, will be  
43  
44  
45 229 noted. Acknowledging that publication bias is difficult to assess, as suggested by GRADE, we will  
46  
47 230 then determine if publication bias is “undetected” or “strongly suspected” and rate down a  
48  
49 231 maximum of one level for suspected bias [28]. Additionally biases in our set of evidence towards  
50  
51 232 certain bacteria, antibiotics and inconsistencies in methodology and outcomes will be assessed and  
52  
53  
54 233 taken into account in determining the confidence of our reported data summary.  
55  
56  
57  
58  
59  
60

1  
2  
3 234 **Ethics and Dissemination**  
4  
5

6 235 Ethical approval is not required as no primary data is to be collected. The completed systematic  
7  
8 236 review will be disseminated through conference meeting presentations and a peer-reviewed  
9  
10  
11 237 publication.  
12

13  
14 238 **Authors Contributions**  
15

16  
17 239 C.C., V.J.W and M.H.Z. initiated work. C.C., E.S.F.O., V.J.W and M.H.Z designed and wrote  
18  
19 240 protocol.  
20  
21

22 241 **Acknowledgements**  
23

24  
25 242 We would like to acknowledge David Flynn from Boston University Medical Alumni Library for  
26  
27 243 assistance with search terms and members of the Zaman lab for their input and feedback.  
28  
29

30 244 **Funding statement**  
31

32  
33 245 This work was funded by a fellowship to C.C. by the United States Pharmacopeia.  
34  
35

36 246 **Competing Interests**  
37

38  
39 247 The authors declare no competing interests.  
40  
41

42 248 **References:**  
43

- 44  
45 249 1 Chatterjee A, Modarai M, Naylor NR, *et al.* Review Quantifying drivers of antibiotic  
46  
47 250 resistance in humans : a systematic review. *Lancet Infect Dis* 2018;**18**:e368–78.  
48  
49 251 doi:10.1016/S1473-3099(18)30296-2  
50  
51  
52 252 2 Okeke IN, Klugman KP, Bhutta ZA, *et al.* Antimicrobial resistance in developing  
53  
54 253 countries. Part II: Strategies for containment. *Lancet Infect Dis* 2005;**5**:568–80.  
55  
56  
57  
58  
59  
60

- 1  
2  
3 254 doi:10.1016/S1473-3099(05)70217-6  
4  
5  
6 255 3 World Health Organization. A Study on the Public Health and Socioeconomic Impact of  
7  
8 256 Substandard and Falsified medical products. 2017.  
9  
10  
11 257 4 World Health Organization. A Study on the Public Health and Socioeconomic Impact of  
12  
13 258 Substandard and Falsified medical products, Executive Summary. 2017;:1–29.  
14  
15  
16 259 5 Holmes AH, Moore LSP, Steinbakk M, *et al.* Antimicrobials : access and sustainable eff  
17  
18 260 ectiveness 2, Understanding the mechanisms and drivers of antimicrobial resistance.  
19  
20 261 *Lancet* 2016;**387**. doi:10.1016/S0140-6736(15)00473-0  
21  
22  
23  
24 262 6 Kim ES, Hooper DC. Clinical importance and epidemiology of quinolone resistance.  
25  
26 263 *Infect Chemother* 2014;**46**:226–38. doi:10.3947/ic.2014.46.4.226  
27  
28  
29 264 7 McEwen SA, Fedorka-Cray PJ. Antimicrobial Use and Resistance in Animals. *Clin Infect*  
30  
31 265 *Dis* 2002;**34**:Supplement.  
32  
33  
34 266 8 Acar JF, Goldstein FW. Trends in Bacterial Resistance to Fluoroquinolones. *Clin Infect*  
35  
36 267 *Dis* 1999;**24**.  
37  
38  
39 268 9 Dalhoff A. Global Fluoroquinolone Resistance Epidemiology and Implications for Clinical  
40  
41 269 Use. *Interdiscip Persepctives Infect Dsiseases* 2012;**2012**. doi:10.1155/2012/976273  
42  
43  
44  
45 270 10 Tillotson GS. Quinolones: Structure-activity relationships and future predictions. *J Med*  
46  
47 271 *Microbiol* 1996;**44**:320–4. doi:10.1099/00222615-44-5-320  
48  
49  
50 272 11 Redgrave LS, Sutton SB, Webber MA, *et al.* Fluoroquinolone resistance : mechanisms ,  
51  
52 273 impact on bacteria , and role in evolutionary success. *Trends Microbiol* 2014;**22**:438–45.  
53  
54 274 doi:10.1016/j.tim.2014.04.007  
55  
56  
57  
58  
59  
60

- 1  
2  
3 275 12 Van Doorslaer X, Dewulf J, Van Langenhove H, *et al.* Fluoroquinolone antibiotics: An  
4  
5 276 emerging class of environmental micropollutants. *Sci Total Environ* 2014;**500–501**:250–  
6  
7 277 69. doi:10.1016/j.scitotenv.2014.08.075  
8  
9  
10 278 13 Andersson DI, Hughes D. Microbiological effects of sublethal levels of antibiotics. *Nat*  
11  
12 279 *Rev Microbiol* 2014;**12**:465–78. doi:10.1038/nrmicro3270  
13  
14  
15 280 14 Zhanel GG, Kim SO, Davidson RJ, *et al.* Effect of subinhibitory concentrations of  
16  
17 281 Ciprofloxacin and gentamicin on the adherence of *Pseudomonas aeruginosa* to Vero cells  
18  
19 282 and voided uroepithelial cells. *Chemotherapy* 1993;**39**:105–11. doi:10.1159/000239110  
20  
21 283 15 Blazquez J, Rodriguez-Beltran J, Matic I. Antibiotic-Induced Genetic Variation: How It  
22  
23 284 Arises and How It Can Be Prevented. In: Gottesman S, ed. *Annual Review of*  
24  
25 285 *Microbiology, Vol 72*. 2018. 209–30. doi:10.1146/annurev-micro-090817-062139  
26  
27  
28 286 16 Broom LJ. The sub-inhibitory theory for antibiotic growth promoters. *Poult Sci*  
29  
30 287 2007;**3**:104–8. doi:10.3382/ps/pex114  
31  
32  
33 288 17 Hagan ECO, Matalon S, Riesenber LA. Systematic reviews of the literature : a better  
34  
35 289 way of addressing basic science controversies. 2018;**2017–20**.  
36  
37 290 doi:10.1152/ajplung.00544.2017  
38  
39  
40 291 18 Editorial. Why basic microbiology still matters. *Nat Rev Microbiol* 2011;**9**:480.  
41  
42 292 doi:10.1038/nrmicro2611  
43  
44  
45 293 19 Van Der Putten BCL, Remondini D, Pasquini G, *et al.* Quantifying the contribution of  
46  
47 294 four resistance mechanisms to ciprofloxacin MIC in *Escherichia coli*: A systematic  
48  
49 295 review. *J Antimicrob Chemother* 2019;**74**:298–310. doi:10.1093/jac/dky417  
50  
51  
52  
53  
54  
55  
56  
57  
58  
59  
60

- 1  
2  
3 296 20 Ouzzani M, Hammady H, Fedorowicz Z, *et al.* Rayyan-a web and mobile app for  
4  
5 297 systematic reviews. *Syst Rev* 2016;**5**:1–10. doi:10.1186/s13643-016-0384-4  
6  
7  
8 298 21 Hooijmans CR, Rovers MM, Vries RBM De, *et al.* SYRCLE 's risk of bias tool for  
9  
10 299 animal studies. 2014;:1–9.  
11  
12  
13 300 22 Thomas BH, Ciliska D, Dobbins M, *et al.* A Process for Systematically Reviewing the  
14  
15 301 Literature : Providing the Research Evidence for Public Health Nursing Interventions.  
16  
17 302 2004.  
18  
19  
20  
21 303 23 MacGuire AE, Ching MC, Diamond BH, *et al.* Activation of phenotypic subpopulations in  
22  
23 304 response to ciprofloxacin treatment in *Acinetobacter baumannii*. *Mol Microbiol*  
24  
25 305 2014;**92**:138–52. doi:10.1111/mmi.12541  
26  
27  
28  
29 306 24 Baquero F. Low-level antibacterial resistance: A gateway to clinical resistance. *Drug*  
30  
31 307 *Resist Updat* 2001;**4**:93–105. doi:10.1054/drup.2001.0196  
32  
33  
34 308 25 Rolston KVI, Frisbee-Hume S, LeBlanc BM, *et al.* Antimicrobial activity of a novel des-  
35  
36 309 fluoro (6) quinolone, garenoxacin (BMS-284756), compared to other quinolones, against  
37  
38 310 clinical isolates from cancer patients. *Diagn Microbiol Infect Dis* 2002;**44**:187–94.  
39  
40 311 doi:10.1016/S0732-8893(02)00433-9  
41  
42  
43  
44 312 26 Boyd LB, Maynard MJ, Morgan-linnell SK, *et al.* Relationships among Ciprofloxacin ,  
45  
46 313 Gatifloxacin , Levofloxacin , and Norfloxacin MICs for Fluoroquinolone-Resistant  
47  
48 314 *Escherichia coli* Clinical Isolates □. *Antimicrob Agents Chemother* 2009;**53**:229–34.  
49  
50 315 doi:10.1128/AAC.00722-08  
51  
52  
53  
54 316 27 Carroll HA, Toumpakari Z, Johnson L, *et al.* The perceived feasibility of methods to  
55  
56  
57  
58  
59  
60

1  
2  
3 317 reduce publication bias. *PLoS One* 2017;**12**:1–19. doi:10.1371/journal.pone.0186472

4  
5  
6 318 28 Nolting A, Perleth M, Langer G, *et al.* GRADE guidelines: 5. Rating the quality of

7  
8 319 evidence - Publication bias. *Z Evid Fortbild Qual Gesundheitswes* 2012;**106**:670–6.

9  
10  
11 320 doi:10.1016/j.zefq.2012.10.015

12  
13  
14 321

15  
16  
17  
18  
19  
20  
21  
22  
23  
24  
25  
26  
27  
28  
29  
30  
31  
32  
33  
34  
35  
36  
37  
38  
39  
40  
41  
42  
43  
44  
45  
46  
47  
48  
49  
50  
51  
52  
53  
54  
55  
56  
57  
58  
59  
60

For peer review only



## Appendix 1. PRISMA-P (Preferred Reporting Items for Systematic review and Meta-Analysis Protocols) 2015 checklist: recommended items to address in a systematic review protocol\*

| Section and topic                 | Item No | Checklist item                                                                                                                                                                                  | (Page No.#)                                                                    |
|-----------------------------------|---------|-------------------------------------------------------------------------------------------------------------------------------------------------------------------------------------------------|--------------------------------------------------------------------------------|
| <b>ADMINISTRATIVE INFORMATION</b> |         |                                                                                                                                                                                                 |                                                                                |
| Title:                            |         |                                                                                                                                                                                                 |                                                                                |
| Identification                    | 1a      | Identify the report as a protocol of a systematic review                                                                                                                                        | 1                                                                              |
| Update                            | 1b      | If the protocol is for an update of a previous systematic review, identify as such                                                                                                              | N/A                                                                            |
| Registration                      | 2       | If registered, provide the name of the registry (such as PROSPERO) and registration number                                                                                                      | 6 (ineligible for PROSPERO hosting because subjects are not humans or animals) |
| Authors:                          |         |                                                                                                                                                                                                 |                                                                                |
| Contact                           | 3a      | Provide name, institutional affiliation, e-mail address of all protocol authors; provide physical mailing address of corresponding author                                                       | 1                                                                              |
| Contributions                     | 3b      | Describe contributions of protocol authors and identify the guarantor of the review                                                                                                             | 15                                                                             |
| Amendments                        | 4       | If the protocol represents an amendment of a previously completed or published protocol, identify as such and list changes; otherwise, state plan for documenting important protocol amendments | N/A                                                                            |
| Support:                          |         |                                                                                                                                                                                                 |                                                                                |
| Sources                           | 5a      | Indicate sources of financial or other support for the review                                                                                                                                   | 15                                                                             |
| Sponsor                           | 5b      | Provide name for the review funder and/or sponsor                                                                                                                                               |                                                                                |
| Role of sponsor or funder         | 5c      | Describe roles of funder(s), sponsor(s), and/or institution(s), if any, in developing the protocol                                                                                              |                                                                                |
| <b>INTRODUCTION</b>               |         |                                                                                                                                                                                                 |                                                                                |
| Rationale                         | 6       | Describe the rationale for the review in the context of what is already known                                                                                                                   | 4-6                                                                            |
| Objectives                        | 7       | Provide an explicit statement of the question(s) the review will address with reference to participants, interventions, comparators, and outcomes (PICO)                                        | 6                                                                              |
| <b>METHODS</b>                    |         |                                                                                                                                                                                                 |                                                                                |
| Eligibility criteria              | 8       | Specify the study characteristics (such as PICO, study design, setting, time frame) and report characteristics (such as years                                                                   | 7-8                                                                            |

|                                    |     |                                                                                                                                                                                                                                                  |                     |
|------------------------------------|-----|--------------------------------------------------------------------------------------------------------------------------------------------------------------------------------------------------------------------------------------------------|---------------------|
|                                    |     | considered, language, publication status) to be used as criteria for eligibility for the review                                                                                                                                                  |                     |
| Information sources                | 9   | Describe all intended information sources (such as electronic databases, contact with study authors, trial registers or other grey literature sources) with planned dates of coverage                                                            | 8                   |
| Search strategy                    | 10  | Present draft of search strategy to be used for at least one electronic database, including planned limits, such that it could be repeated                                                                                                       | 9-10 and Appendix 2 |
| Study records:                     |     |                                                                                                                                                                                                                                                  |                     |
| Data management                    | 11a | Describe the mechanism(s) that will be used to manage records and data throughout the review                                                                                                                                                     | 10                  |
| Selection process                  | 11b | State the process that will be used for selecting studies (such as two independent reviewers) through each phase of the review (that is, screening, eligibility and inclusion in meta-analysis)                                                  | 10                  |
| Data collection process            | 11c | Describe planned method of extracting data from reports (such as piloting forms, done independently, in duplicate), any processes for obtaining and confirming data from investigators                                                           | 8-9                 |
| Data items                         | 12  | List and define all variables for which data will be sought (such as PICO items, funding sources), any pre-planned data assumptions and simplifications                                                                                          | 7-8                 |
| Outcomes and prioritization        | 13  | List and define all outcomes for which data will be sought, including prioritization of main and additional outcomes, with rationale                                                                                                             | 8-9                 |
| Risk of bias in individual studies | 14  | Describe anticipated methods for assessing risk of bias of individual studies, including whether this will be done at the outcome or study level, or both; state how this information will be used in data synthesis                             | 10-13               |
| Data synthesis                     | 15a | Describe criteria under which study data will be quantitatively synthesised                                                                                                                                                                      | 13-14               |
|                                    | 15b | If data are appropriate for quantitative synthesis, describe planned summary measures, methods of handling data and methods of combining data from studies, including any planned exploration of consistency (such as $I^2$ , Kendall's $\tau$ ) |                     |
|                                    | 15c | Describe any proposed additional analyses (such as sensitivity or subgroup analyses, meta-regression)                                                                                                                                            |                     |
|                                    | 15d | If quantitative synthesis is not appropriate, describe the type of summary planned                                                                                                                                                               |                     |
| Meta-bias(es)                      | 16  | Specify any planned assessment of meta-bias(es) (such as publication bias across studies, selective reporting within studies)                                                                                                                    | 14-15               |
| Confidence in cumulative evidence  | 17  | Describe how the strength of the body of evidence will be assessed (such as GRADE)                                                                                                                                                               | 14-15               |

**\* It is strongly recommended that this checklist be read in conjunction with the PRISMA-P Explanation and Elaboration (cite when available) for important clarification on the items. Amendments to a review protocol should be tracked and dated. The copyright for PRISMA-P (including checklist) is held by the PRISMA-P Group and is distributed under a Creative Commons Attribution Licence 4.0.**

*From: Shamseer L, Moher D, Clarke M, Ghersi D, Liberati A, Petticrew M, Shekelle P, Stewart L, PRISMA-P Group. Preferred reporting items for systematic review and meta-analysis protocols (PRISMA-P) 2015: elaboration and explanation. BMJ. 2015 Jan 2;349(jan02 1):g7647.*

## Appendix 2: Search Terms

### PUBMED

Search Term\*:

((quinolone) AND (subinhibitory OR sub-inhibitory OR "sub inhibitory" OR sub-lethal OR sublethal OR "sub lethal" OR subminimal OR sub-minimal OR "sub minimal" OR subminimum OR sub-minimum OR "sub minimum" OR sub-therapeutic OR subtherapeutic OR "sub therapeutic" OR "sub MIC" OR sub-mic OR low-dose OR "low dose" OR substandard OR "sub standard" OR sub-standard OR counterfeit OR falsified)) AND (Drug Resistance, Microbial OR Antimicrobial Drug Resistance OR Antimicrobial Drug Resistances OR Antibiotic Resistance OR Microbial Antibiotic Resistance OR Resistance, Antibiotic OR Resistance OR Resistant OR Mutagenesis OR Mutation OR Mutagenicity OR Gene expression OR transcription or transcriptional)

Complete Search Term:

((("quinolones"[MeSH Terms] OR "quinolones"[All Fields] OR "quinolone"[All Fields]) AND (subinhibitory[All Fields] OR sub-inhibitory[All Fields] OR "sub inhibitory"[All Fields] OR sub-lethal[All Fields] OR sublethal[All Fields] OR "sub lethal"[All Fields] OR subminimal[All Fields] OR sub-minimal[All Fields] OR "sub minimal"[All Fields] OR subminimum[All Fields] OR sub-minimum[All Fields] OR "sub minimum"[All Fields] OR sub-therapeutic[All Fields] OR subtherapeutic[All Fields] OR "sub therapeutic"[All Fields] OR "sub MIC"[All Fields] OR sub-mic[All Fields] OR low-dose[All Fields] OR "low dose"[All Fields] OR substandard[All Fields] OR "sub standard"[All Fields] OR sub-standard[All Fields] OR counterfeit[All Fields] OR falsified[All Fields])) AND (("drug resistance, microbial"[MeSH Terms] OR ("drug"[All Fields] AND "resistance"[All Fields] AND "microbial"[All Fields]) OR "microbial drug resistance"[All Fields] OR ("drug"[All Fields] AND "resistance"[All Fields] AND "microbial"[All Fields]) OR "drug resistance, microbial"[All Fields] OR ("drug resistance, microbial"[MeSH Terms] OR ("drug"[All Fields] AND "resistance"[All Fields] AND "microbial"[All Fields]) OR "microbial drug resistance"[All Fields] OR ("antimicrobial"[All Fields] AND "drug"[All Fields] AND "resistance"[All Fields]) OR "antimicrobial drug resistance"[All Fields] OR ("drug resistance, microbial"[MeSH Terms] OR ("drug"[All Fields] AND "resistance"[All Fields] AND "microbial"[All Fields]) OR "microbial drug resistance"[All Fields] OR ("antibiotic"[All Fields] AND "resistance"[All Fields]) OR "antibiotic resistance"[All Fields]) OR (Microbial[All Fields] AND ("drug resistance, microbial"[MeSH Terms] OR ("drug"[All Fields] AND "resistance"[All Fields] AND "microbial"[All Fields]) OR "microbial drug resistance"[All Fields] OR ("antibiotic"[All Fields] AND "resistance"[All Fields]) OR "antibiotic resistance"[All Fields])) OR ("drug resistance, microbial"[MeSH Terms] OR ("drug"[All Fields] AND "resistance"[All Fields] AND "microbial"[All Fields]) OR "microbial drug resistance"[All Fields] OR ("resistance"[All Fields] AND "antibiotic"[All Fields]) OR "resistance, antibiotic"[All Fields]) OR Resistance[All Fields] OR Resistant[All Fields] OR ("mutagenesis"[MeSH Terms] OR "mutagenesis"[All Fields]) OR ("mutation"[MeSH Terms] OR "mutation"[All Fields]) OR Mutagenicity[All Fields] OR ("gene expression"[MeSH Terms] OR ("gene"[All Fields] AND "expression"[All Fields]) OR "gene expression"[All Fields]) OR ("transcription, genetic"[MeSH Terms] OR ("transcription"[All Fields] AND "genetic"[All Fields]) OR "genetic transcription"[All Fields] OR "transcription"[All Fields] OR ("transcription, genetic"[MeSH Terms] OR ("transcription"[All Fields] AND "genetic"[All Fields]) OR "genetic transcription"[All Fields] OR "transcriptional"[All Fields]))))

### Web of Science

Search Term\*:

1  
2  
3 TS=(quinolone\* OR fluoroquinolone\* OR ciprofloxacin OR norfloxacin OR ofloxacin OR  
4 levofloxacin OR moxifloxacin OR gemifloxacin or enrofloxacin) AND TS=(subinhibitory OR sub-  
5 inhibitory OR "sub inhibitory" OR sub-lethal OR sublethal OR "sub lethal" OR subminimal OR  
6 sub-minimal OR "sub minimal" OR subminimum OR sub-minimum OR "sub minimum" OR sub-  
7 therapeutic OR subtherapeutic OR "sub therapeutic" OR "sub MIC" OR sub-mic OR low-dose OR  
8 "low dose" OR substandard OR "sub standard" OR sub-standard OR counterfeit OR falsified)  
9 AND TS=(Drug Resistance, Microbial OR Antimicrobial Drug Resistance OR Antimicrobial Drug  
10 Resistances OR Antibiotic Resistance OR Microbial Antibiotic Resistance OR Resistance,  
11 Antibiotic OR Resistance OR Resistant OR Mutagenesis OR Mutation OR Mutagenicity OR Gene  
12 expression OR transcription or transcriptional)  
13  
14  
15

### 16 Embase

17 Search Term\*:

18 (subinhibitory OR 'sub inhibitory' OR 'sub-lethal' OR sublethal OR 'sub  
19 lethal' OR subminimal OR 'sub-minimal' OR 'sub minimal' OR subminimum OR 'sub-minimum'  
20 OR 'sub minimum' OR 'sub-therapeutic' OR subtherapeutic OR 'sub therapeutic' OR 'sub  
21 mic' OR 'sub-mic' OR 'low-dose' OR 'low dose' OR substandard OR 'sub standard' OR 'sub-  
22 standard' OR counterfeit OR falsified) AND ('quinolone derived antiinfective agent'/exp  
23 OR 'anti infective agents, fluoroquinolone' OR 'anti infective agents, quinolone' OR 'anti-  
24 infective agents, fluoroquinolone' OR 'anti-infective agents, quinolone' OR 'antibiotics,  
25 quinolones' OR 'chinolone antibiotic' OR 'fluoroquinolone (antibiotic)' OR 'fluoroquinolone  
26 antibiotic' OR 'fluoroquinolone antibiotic agent' OR 'fluoroquinolone antiinfective  
27 agent' OR 'fluoroquinolone antimicrobial agent' OR 'quinolone derived antiinfective  
28 agent' OR 'quinolone (antibiotic)' OR 'quinolone antibiotic' OR 'quinolone  
29 antibiotics' OR 'quinolone antiinfective agent') AND ('antibiotic resistance'/exp  
30 OR 'antibacterial drug resistance' OR 'antibacterial resistance' OR 'antibiotic  
31 resistance' OR 'antimicrobial drug resistance' OR 'antimicrobial resistance' OR 'bacterial drug  
32 resistance' OR 'bacterial resistance' OR 'bacterium resistance' OR 'drug resistance,  
33 bacterial' OR 'drug resistance, microbial' OR 'microbial drug  
34 resistance' OR 'resistance' OR 'resistant' OR 'gene expression'/exp OR 'expression,  
35 gene' OR 'gene expression' OR 'genetic expression' OR 'genome expression' OR 'genetic  
36 transcription'/exp OR transcription OR transcriptional)  
37  
38  
39  
40  
41  
42  
43

44 **\*Amendment** – While gene expression is included in the above search terms, gene expression  
45 will be excluded from the outcomes.  
46  
47  
48  
49  
50  
51  
52  
53  
54  
55  
56  
57  
58  
59  
60
