# Supplementary material for: Bacterial antibiotic resistance development and mutagenesis following exposure to subminimal inhibitory concentrations of fluoroquinolones in vitro: a systematic literature review protocol
Source: PubMed Central journal article supplement — BMJ Open. 2019 Oct 30;9(10):e030747. doi: 10.1136/bmjopen-2019-030747 (PMC6830604; doi:10.1136/bmjopen-2019-030747), 2019-10-30
Supplement: bmjopen-2019-030747supp002.pdf [file bmjopen-2019-030747supp002.pdf]

## Appendix 2: Search Terms

### PUBMED

Search Term\*:

((quinolone) AND (subinhibitory OR sub-inhibitory OR "sub inhibitory" OR sub-lethal OR sublethal OR "sub lethal" OR subminimal OR sub-minimal OR "sub minimal" OR subminimum OR sub-minimum OR "sub minimum" OR sub-therapeutic OR subtherapeutic OR "sub therapeutic" OR "sub MIC" OR sub-mic OR low-dose OR "low dose" OR substandard OR "sub standard" OR sub-standard OR counterfeit OR falsified)) AND (Drug Resistance, Microbial OR Antimicrobial Drug Resistance OR Antimicrobial Drug Resistances OR Antibiotic Resistance OR Microbial Antibiotic Resistance OR Resistance, Antibiotic OR Resistance OR Resistant OR Mutagenesis OR Mutation OR Mutagenicity OR Gene expression OR transcription or transcriptional)

Complete Search Term:

((("quinolones"[MeSH Terms] OR "quinolones"[All Fields] OR "quinolone"[All Fields]) AND (subinhibitory[All Fields] OR sub-inhibitory[All Fields] OR "sub inhibitory"[All Fields] OR sub-lethal[All Fields] OR sublethal[All Fields] OR "sub lethal"[All Fields] OR subminimal[All Fields] OR sub-minimal[All Fields] OR "sub minimal"[All Fields] OR subminimum[All Fields] OR sub-minimum[All Fields] OR "sub minimum"[All Fields] OR sub-therapeutic[All Fields] OR subtherapeutic[All Fields] OR "sub therapeutic"[All Fields] OR "sub MIC"[All Fields] OR sub-mic[All Fields] OR low-dose[All Fields] OR "low dose"[All Fields] OR substandard[All Fields] OR "sub standard"[All Fields] OR sub-standard[All Fields] OR counterfeit[All Fields] OR falsified[All Fields])) AND (("drug resistance, microbial"[MeSH Terms] OR ("drug"[All Fields] AND "resistance"[All Fields] AND "microbial"[All Fields]) OR "microbial drug resistance"[All Fields] OR ("drug"[All Fields] AND "resistance"[All Fields] AND "microbial"[All Fields]) OR "microbial drug resistance"[All Fields] OR "drug resistance, microbial"[All Fields] OR ("drug resistance, microbial"[MeSH Terms] OR ("drug"[All Fields] AND "resistance"[All Fields] AND "microbial"[All Fields]) OR "microbial drug resistance"[All Fields] OR ("antimicrobial"[All Fields] AND "drug"[All Fields] AND "resistance"[All Fields]) OR "antimicrobial drug resistance"[All Fields] OR ("drug resistance, microbial"[MeSH Terms] OR ("drug"[All Fields] AND "resistance"[All Fields] AND "microbial"[All Fields]) OR "microbial drug resistance"[All Fields] OR ("antimicrobial"[All Fields] AND "drug"[All Fields] AND "resistances"[All Fields]) OR "antimicrobial drug resistances"[All Fields] OR ("drug resistance, microbial"[MeSH Terms] OR ("drug"[All Fields] AND "resistance"[All Fields] AND "microbial"[All Fields]) OR "microbial drug resistance"[All Fields] OR ("antibiotic"[All Fields] AND "resistance"[All Fields]) OR "antibiotic resistance"[All Fields] OR (Microbial[All Fields] AND ("drug resistance, microbial"[MeSH Terms] OR ("drug"[All Fields] AND "resistance"[All Fields] AND "microbial"[All Fields]) OR "microbial drug resistance"[All Fields] OR ("antibiotic"[All Fields] AND "resistance"[All Fields]) OR "antibiotic resistance"[All Fields])) OR ("drug resistance, microbial"[MeSH Terms] OR ("drug"[All Fields] AND "resistance"[All Fields] AND "microbial"[All Fields]) OR "microbial drug resistance"[All Fields] OR ("resistance"[All Fields] AND "antibiotic"[All Fields]) OR "resistance, antibiotic"[All Fields] OR Resistance[All Fields] OR Resistant[All Fields] OR ("mutagenesis"[MeSH Terms] OR "mutagenesis"[All Fields] OR ("mutation"[MeSH Terms] OR "mutation"[All Fields]) OR Mutagenicity[All Fields] OR ("gene expression"[MeSH Terms] OR ("gene"[All Fields] AND "expression"[All Fields]) OR "gene expression"[All Fields]) OR ("transcription, genetic"[MeSH Terms] OR ("transcription"[All Fields] AND "genetic"[All Fields]) OR "genetic transcription"[All Fields] OR "transcription"[All Fields]) OR ("transcription, genetic"[MeSH Terms] OR ("transcription"[All Fields] AND "genetic"[All Fields]) OR "genetic transcription"[All Fields] OR "transcriptional"[All Fields]))))

### Web of Science

Search Term\*:

TS=(quinolone\* OR fluoroquinolone\* OR ciprofloxacin OR norfloxacin OR ofloxacin OR levofloxacin OR moxifloxacin OR gemifloxacin or enrofloxacin) AND TS=(subinhibitory OR sub-inhibitory OR "sub inhibitory" OR sub-lethal OR sublethal OR "sub lethal" OR subminimal OR sub-minimal OR "sub minimal" OR subminimum OR sub-minimum OR "sub minimum" OR sub-therapeutic OR subtherapeutic OR "sub therapeutic" OR "sub MIC" OR sub-mic OR low-dose OR "low dose" OR substandard OR "sub standard" OR sub-standard OR counterfeit OR falsified) AND TS=(Drug Resistance, Microbial OR Antimicrobial Drug Resistance OR Antimicrobial Drug Resistances OR Antibiotic Resistance OR Microbial Antibiotic Resistance OR Resistance, Antibiotic OR Resistance OR Resistant OR Mutagenesis OR Mutation OR Mutagenicity OR Gene expression OR transcription or transcriptional)

### **Embase**

Search Term\*:

(subinhibitory OR 'sub inhibitory' OR 'sub-lethal' OR sublethal OR 'sub lethal' OR subminimal OR 'sub-minimal' OR 'sub minimal' OR subminimum OR 'sub-minimum' OR 'sub minimum' OR 'sub-therapeutic' OR subtherapeutic OR 'sub therapeutic' OR 'sub mic' OR 'sub-mic' OR 'low-dose' OR 'low dose' OR substandard OR 'sub standard' OR 'sub-standard' OR counterfeit OR falsified) AND ('quinoline derived antiinfective agent'/exp OR 'anti infective agents, fluoroquinolone' OR 'anti infective agents, quinolone' OR 'anti-infective agents, fluoroquinolone' OR 'anti-infective agents, quinolone' OR 'antibiotics, quinolones' OR 'chinolone antibiotic' OR 'fluoroquinolone (antibiotic)' OR 'fluoroquinolone antibiotic' OR 'fluoroquinolone antibiotic agent' OR 'fluoroquinolone antiinfective agent' OR 'fluoroquinolone antimicrobial agent' OR 'quinoline derived antiinfective agent' OR 'quinolone (antibiotic)' OR 'quinolone antibiotic' OR 'quinolone antibiotics' OR 'quinolone antiinfective agent') AND ('antibiotic resistance'/exp OR 'antibacterial drug resistance' OR 'antibacterial resistance' OR 'antibiotic resistance' OR 'antimicrobial drug resistance' OR 'antimicrobial resistance' OR 'bacterial drug resistance' OR 'bacterial resistance' OR 'bacterium resistance' OR 'drug resistance, bacterial' OR 'drug resistance, microbial' OR 'microbial drug resistance' OR 'resistance' OR 'resistant' OR 'gene expression'/exp OR 'expression, gene' OR 'gene expression' OR 'genetic expression' OR 'genome expression' OR 'genetic transcription'/exp OR transcription OR transcriptional)

**\*Amendment** – While gene expression is included in the above search terms, gene expression will be excluded from the outcomes.
